# Supplementary material for: Respiratory Effects of Exposure to Diesel Traffic in Persons with Asthma
Source: Atypon-hosted journal article supplement (doi:10.1056/nejmoa071535), 2007-12-05
Supplement: nejm_mccreanor_2348sa1.pdf [file nejm_mccreanor_2348sa1.pdf]

## Supplementary Appendix

This appendix has been provided by the authors to give readers additional information about their work.

Supplement to: McCreanor J, Cullinan P, Nieuwenhuijsen MJ, et al. Respiratory effects of exposure to diesel traffic in persons with asthma. *N Engl J Med* 2007;357:2348-58.

**Respiratory effects of real-life diesel traffic in persons with asthma.  
MS #07-1535**

**Supplementary web material**

**Completeness of data collection**

|                           | <b>Valid data<br/>n(%)</b> |
|---------------------------|----------------------------|
| <b>FEV1</b>               | 55 (92%)                   |
| <b>FVC</b>                | 55 (92%)                   |
| <b>FEF</b>                | 55 (92%)                   |
| <b>FE<sub>NO</sub></b>    | 60 (100%)                  |
| <b>EBCpH</b>              | 60 (100%)                  |
| <b>Sputum Neutrophils</b> | 43 (72%)                   |
| <b>Sputum MPO</b>         | 41 (68%)                   |
| <b>Sputum IL-8</b>        | 41 (68%)                   |

**Table A1 Spearman correlation coefficients (r) between pollutant measurements**

|                         | <b>pm<sub>2.5</sub></b> | <b>UFP</b> | <b>EC</b> | <b>NO<sub>2</sub></b> | <b>CO</b> |
|-------------------------|-------------------------|------------|-----------|-----------------------|-----------|
| <b>pm<sub>2.5</sub></b> | -                       | 0.62       | 0.73      | 0.60                  | 0.76      |
| <b>UFP</b>              | -                       | -          | 0.84      | 0.58                  | 0.61      |
| <b>EC</b>               | -                       | -          | -         | 0.58                  | 0.73      |
| <b>NO<sub>2</sub></b>   | -                       | -          | -         | -                     | 0.51      |

**Table A2. results of statistical analyses examining potential interaction between the effects of exposure (Oxford Street vs Hyde Park) and other variables (Table 1 in printed manuscript) for all subjects and, separately, for those with mild and moderate asthma.**

| <b>ALL SUBJECTS</b>                 | <b>(d,f)</b> | <b>F</b> | <b>p-value</b> |
|-------------------------------------|--------------|----------|----------------|
| <b>FEV1</b>                         |              |          |                |
| AGE*EXPOSURE*TIME                   | (13, 563)    | 0.49     | 0.928          |
| SEX*EXPOSURE*TIME                   | (13, 563)    | 1.22     | 0.262          |
| HEIGHT*EXPOSURE*TIME                | (13, 563)    | 0.73     | 0.734          |
| ETHNICITY*EXPOSURE*TIME             | (13, 563)    | 0.77     | 0.694          |
| ATOPY*EXPOSURE*TIME                 | (13, 563)    | 0.69     | 0.773          |
| ASTHMA*EXPOSURE*TIME                | (13, 563)    | 0.61     | 0.849          |
| STEROID*EXPOSURE*TIME               | (13, 563)    | 0.69     | 0.771          |
| TOLERANCE*EXPOSURE*TIME             | (13, 563)    | 0.48     | 0.937          |
| EXERCISE*EXPOSURE*TIME              | (26, 552)    | 1.4      | 0.094          |
| TRAFFIC*EXPOSURE*TIME               | (26, 550)    | 0.95     | 0.540          |
| <b>FVC</b>                          |              |          |                |
| AGE*EXPOSURE*TIME                   | (13, 561)    | 2.28     | 0.006          |
| SEX*EXPOSURE*TIME                   | (13, 561)    | 0.48     | 0.936          |
| HEIGHT*EXPOSURE*TIME                | (13, 561)    | 0.86     | 0.594          |
| ETHNICITY*EXPOSURE*TIME             | (13, 561)    | 1.23     | 0.253          |
| ATOPY*EXPOSURE*TIME                 | (13, 561)    | 0.48     | 0.936          |
| ASTHMA*EXPOSURE*TIME                | (13, 561)    | 2.23     | 0.008          |
| STEROID*EXPOSURE*TIME               | (13, 562)    | 0.59     | 0.866          |
| TOLERANCE*EXPOSURE*TIME             | (13, 561)    | 0.87     | 0.583          |
| EXERCISE*EXPOSURE*TIME              | (26, 550)    | 0.98     | 0.493          |
| TRAFFIC*EXPOSURE*TIME               | (26, 548)    | 0.99     | 0.479          |
| <b>FEF</b>                          |              |          |                |
| AGE*EXPOSURE*TIME                   | (13, 561)    | 3.8      | <0.001         |
| SEX*EXPOSURE*TIME                   | (13, 561)    | 2.65     | 0.001          |
| HEIGHT*EXPOSURE*TIME                | (13, 561)    | 2.3      | 0.006          |
| ETHNICITY*EXPOSURE*TIME             | (13, 561)    | 0.89     | 0.559          |
| ATOPY*EXPOSURE*TIME                 | (13, 561)    | 0.82     | 0.634          |
| ASTHMA*EXPOSURE*TIME                | (13, 561)    | 0.85     | 0.602          |
| STEROID*EXPOSURE*TIME               | (13, 562)    | 0.92     | 0.527          |
| TOLERANCE*EXPOSURE*TIME             | (13, 561)    | 0.5      | 0.926          |
| EXERCISE*EXPOSURE*TIME              | (26, 550)    | 0.59     | 0.947          |
| TRAFFIC*EXPOSURE*TIME               | (26, 548)    | 0.47     | 0.989          |
| <b>FE<sub>NO</sub></b>              |              |          |                |
| AGE*EXPOSURE*TIME                   | (13, 578)    | 1.83     | 0.036          |
| SEX*EXPOSURE*TIME                   | (13, 578)    | 0.76     | 0.707          |
| HEIGHT*EXPOSURE*TIME                | (13, 577)    | 0.8      | 0.661          |
| ETHNICITY*EXPOSURE*TIME             | (13, 578)    | 0.93     | 0.526          |
| ATOPY*EXPOSURE*TIME                 | (13, 578)    | 0.85     | 0.612          |
| ASTHMA*EXPOSURE*TIME                | (13, 578)    | 0.57     | 0.881          |
| STEROID*EXPOSURE*TIME               | (13, 579)    | 0.47     | 0.941          |
| TOLERANCE*EXPOSURE*TIME             | (13, 578)    | 1.47     | 0.125          |
| EXERCISE*EXPOSURE*TIME              | (26, 567)    | 0.74     | 0.818          |
| TRAFFIC*EXPOSURE*TIME               | (26, 565)    | 0.8      | 0.754          |
| <b>Exhaled breath condensate pH</b> |              |          |                |
| AGE*EXPOSURE*TIME                   | (5, 193)     | 0.49     | 0.787          |
| SEX*EXPOSURE*TIME                   | (5, 193)     | 0.1      | 0.992          |

|                         |           |      |       |
|-------------------------|-----------|------|-------|
| HEIGHT*EXPOSURE*TIME    | (5, 192)  | 0.49 | 0.786 |
| ETHNICITY*EXPOSURE*TIME | (5, 193)  | 0.57 | 0.723 |
| ATOPY*EXPOSURE*TIME     | (5, 193)  | 0.69 | 0.631 |
| ASTHMA*EXPOSURE*TIME    | (5, 193)  | 1.29 | 0.268 |
| STEROID*EXPOSURE*TIME   | (5, 194)  | 1.25 | 0.286 |
| TOLERANCE*EXPOSURE*TIME | (5, 193)  | 1.24 | 0.293 |
| EXERCISE*EXPOSURE*TIME  | (10, 190) | 1.79 | 0.065 |
| TRAFFIC*EXPOSURE*TIME   | (10, 188) | 1.34 | 0.214 |
| <b>Myeloperoxidase</b>  |           |      |       |
| AGE*EXPOSURE            | (1, 31)   | 0.63 | 0.433 |
| SEX*EXPOSURE            | (1, 31)   | 1.06 | 0.312 |
| HEIGHT*EXPOSURE         | (1, 30)   | 0.04 | 0.840 |
| ETHNICITY*EXPOSURE      | (1, 31)   | 3.4  | 0.075 |
| ATOPY*EXPOSURE          | (1, 31)   | 0.19 | 0.666 |
| ASTHMA*EXPOSURE         | (1, 31)   | 1.52 | 0.226 |
| STEROID*EXPOSURE        | (1, 31)   | 1.01 | 0.322 |
| TOLERANCE*EXPOSURE      | (1, 31)   | 8.91 | 0.006 |
| EXERCISE*EXPOSURE       | (2, 30)   | 0.02 | 0.976 |
| TRAFFIC*EXPOSURE        | (2, 30)   | 0.25 | 0.778 |
| <b>Neutrophils</b>      |           |      |       |
| AGE*EXPOSURE            | (1, 20)   | 0.02 | 0.884 |
| SEX*EXPOSURE            | (1, 20)   | 3.38 | 0.081 |
| HEIGHT*EXPOSURE         | (1, 20)   | 1.05 | 0.317 |
| ETHNICITY*EXPOSURE      | (1, 20)   | 0.6  | 0.448 |
| ATOPY*EXPOSURE          | (1, 20)   | 0.29 | 0.596 |
| ASTHMA*EXPOSURE         | (1, 20)   | 1.2  | 0.286 |
| STEROID*EXPOSURE        | (1, 20)   | 0.14 | 0.714 |
| TOLERANCE*EXPOSURE      | (1, 20)   | 0.26 | 0.618 |
| EXERCISE*EXPOSURE       | (2, 19)   | 0.2  | 0.658 |
| TRAFFIC*EXPOSURE        | (2, 19)   | 0.39 | 0.683 |
| <b>IL-8</b>             |           |      |       |
| AGE*EXPOSURE            | (1, 33)   | 0.17 | 0.921 |
| SEX*EXPOSURE            | (1, 33)   | 0.28 | 0.601 |
| HEIGHT*EXPOSURE         | (1, 32)   | 6.78 | 0.014 |
| ETHNICITY*EXPOSURE      | (1, 33)   | 1.68 | 0.203 |
| ATOPY*EXPOSURE          | (1, 33)   | 0.02 | 0.894 |
| ASTHMA*EXPOSURE         | (1, 33)   | 0.03 | 0.870 |
| STEROID*EXPOSURE        | (1, 33)   | 0.22 | 0.642 |
| TOLERANCE*EXPOSURE      | (1, 33)   | 0.06 | 0.803 |
| EXERCISE*EXPOSURE       | (2, 32)   | 3.71 | 0.036 |
| TRAFFIC*EXPOSURE        | (2, 32)   | 0.36 | 0.701 |

| <b>MILD ASTHMA</b>      | (d,f)     | F    | p-value |
|-------------------------|-----------|------|---------|
| <b>FEV1</b>             |           |      |         |
| AGE*EXPOSURE*TIME       | (13, 293) | 1.29 | 0.219   |
| SEX*EXPOSURE*TIME       | (13, 293) | 0.87 | 0.587   |
| HEIGHT*EXPOSURE*TIME    | (13, 293) | 0.71 | 0.751   |
| ETHNICITY*EXPOSURE*TIME | (13, 293) | 1.12 | 0.337   |
| ATOPY*EXPOSURE*TIME     | (13, 293) | 0.5  | 0.921   |
| STEROID*EXPOSURE*TIME   | (13, 293) | 0.9  | 0.556   |
| TOLERANCE*EXPOSURE*TIME | (13, 293) | 0.79 | 0.669   |
| EXERCISE*EXPOSURE*TIME  | (26, 281) | 0.88 | 0.644   |

|                                     |           |      |        |
|-------------------------------------|-----------|------|--------|
| TRAFFIC*EXPOSURE*TIME               | (26, 281) | 1.55 | 0.045  |
| <b>FVC</b>                          |           |      |        |
| AGE*EXPOSURE*TIME                   | (13, 292) | 2.28 | 0.007  |
| SEX*EXPOSURE*TIME                   | (13, 292) | 1.03 | 0.419  |
| HEIGHT*EXPOSURE*TIME                | (13, 292) | 1.35 | 0.185  |
| ETHNICITY*EXPOSURE*TIME             | (13, 292) | 0.91 | 0.540  |
| ATOPY*EXPOSURE*TIME                 | (13, 292) | 0.65 | 0.809  |
| STEROID*EXPOSURE*TIME               | (13, 292) | 0.74 | 0.725  |
| TOLERANCE*EXPOSURE*TIME             | (13, 292) | 1    | 0.453  |
| EXERCISE*EXPOSURE*TIME              | (26, 280) | 0.83 | 0.710  |
| TRAFFIC*EXPOSURE*TIME               | (26, 280) | 1.25 | 0.188  |
| <b>FEF</b>                          |           |      |        |
| AGE*EXPOSURE*TIME                   | (13, 292) | 4.17 | <0.001 |
| SEX*EXPOSURE*TIME                   | (13, 292) | 0.97 | 0.481  |
| HEIGHT*EXPOSURE*TIME                | (13, 292) | 1.57 | 0.094  |
| ETHNICITY*EXPOSURE*TIME             | (13, 292) | 0.46 | 0.947  |
| ATOPY*EXPOSURE*TIME                 | (13, 292) | 0.44 | 0.955  |
| STEROID*EXPOSURE*TIME               | (13, 292) | 0.71 | 0.749  |
| TOLERANCE*EXPOSURE*TIME             | (13, 292) | 0.43 | 0.960  |
| EXERCISE*EXPOSURE*TIME              | (26, 280) | 0.51 | 0.978  |
| TRAFFIC*EXPOSURE*TIME               | (26, 280) | 0.63 | 0.924  |
| <b>FE<sub>No</sub></b>              |           |      |        |
| AGE*EXPOSURE*TIME                   | (13, 299) | 1.2  | 0.276  |
| SEX*EXPOSURE*TIME                   | (13, 300) | 1.02 | 0.428  |
| HEIGHT*EXPOSURE*TIME                | (13, 298) | 1.12 | 0.345  |
| ETHNICITY*EXPOSURE*TIME             | (13, 300) | 0.21 | 0.999  |
| ATOPY*EXPOSURE*TIME                 | (13, 300) | 0.5  | 0.923  |
| STEROID*EXPOSURE*TIME               | (13, 300) | 0.44 | 0.955  |
| TOLERANCE*EXPOSURE*TIME             | (13, 300) | 1.39 | 0.165  |
| EXERCISE*EXPOSURE*TIME              | (26, 288) | 0.92 | 0.584  |
| TRAFFIC*EXPOSURE*TIME               | (26, 288) | 1.13 | 0.307  |
| <b>Exhaled breath condensate pH</b> |           |      |        |
| AGE*EXPOSURE*TIME                   | (5, 99)   | 0.7  | 0.624  |
| SEX*EXPOSURE*TIME                   | (5, 100)  | 0.05 | 0.999  |
| HEIGHT*EXPOSURE*TIME                | (5, 100)  | 1.54 | 0.184  |
| ETHNICITY*EXPOSURE*TIME             | (5, 100)  | 0.74 | 0.595  |
| ATOPY*EXPOSURE*TIME                 | (5, 100)  | 0.49 | 0.785  |
| STEROID*EXPOSURE*TIME               | (5, 100)  | 0.92 | 0.469  |
| TOLERANCE*EXPOSURE*TIME             | (5, 100)  | 2    | 0.085  |
| EXERCISE*EXPOSURE*TIME              | (10, 96)  | 1.61 | 0.115  |
| TRAFFIC*EXPOSURE*TIME               | (10, 96)  | 1.84 | 0.063  |
| <b>Myeloperoxidase</b>              |           |      |        |
| AGE*EXPOSURE                        | (1, 16)   | 0    | 0.974  |
| SEX*EXPOSURE                        | (1, 16)   | 0.43 | 0.521  |
| HEIGHT*EXPOSURE                     | (1, 16)   | 0.41 | 0.531  |
| ETHNICITY*EXPOSURE                  | (1, 16)   | 3.52 | 0.079  |
| ATOPY*EXPOSURE                      | (1, 16)   | 0.01 | 0.909  |
| STEROID*EXPOSURE                    | (1, 16)   | 0.03 | 0.868  |
| TOLERANCE*EXPOSURE                  | (1, 16)   | 0.49 | 0.495  |
| EXERCISE*EXPOSURE                   | (2, 15)   | 0.37 | 0.699  |
| TRAFFIC*EXPOSURE                    | (2, 15)   | 1.01 | 0.386  |
| <b>Neutrophils</b>                  |           |      |        |
| AGE*EXPOSURE                        | (1, 11)   | 1.45 | 0.255  |
| SEX*EXPOSURE                        | (1, 12)   | 3.92 | 0.071  |

|                    |         |      |       |
|--------------------|---------|------|-------|
| HEIGHT*EXPOSURE    | (1, 11) | 0.47 | 0.508 |
| ETHNICITY*EXPOSURE | (1, 12) | 0.23 | 0.639 |
| ATOPY*EXPOSURE     | (1, 12) | 0.06 | 0.811 |
| STEROID*EXPOSURE   | (1, 12) | 0.03 | 0.864 |
| TOLERANCE*EXPOSURE | (1, 12) | 0.01 | 0.915 |
| EXERCISE*EXPOSURE  | (1, 12) | 0.27 | 0.612 |
| TRAFFIC*EXPOSURE   | (2, 11) | 0.29 | 0.753 |
| <b>IL-8</b>        |         |      |       |
| AGE*EXPOSURE       | (1, 18) | 0.19 | 0.667 |
| SEX*EXPOSURE       | (1, 18) | 0.03 | 0.867 |
| HEIGHT*EXPOSURE    | (1, 17) | 2.52 | 0.131 |
| ETHNICITY*EXPOSURE | (1, 18) | 0.66 | 0.426 |
| ATOPY*EXPOSURE     | (1, 18) | 0.02 | 0.896 |
| STEROID*EXPOSURE   | (1, 18) | 0.74 | 0.402 |
| TOLERANCE*EXPOSURE | (1, 18) | 0.13 | 0.724 |
| EXERCISE*EXPOSURE  | (2, 17) | 3.25 | 0.063 |
| TRAFFIC*EXPOSURE   | (2, 17) | 1.31 | 0.295 |

| <b>Moderate asthma</b>  | (d,f)     | F    | p-value |
|-------------------------|-----------|------|---------|
| <b>FEV1</b>             |           |      |         |
| AGE*EXPOSURE*TIME       | (13, 244) | 0.5  | 0.925   |
| SEX*EXPOSURE*TIME       | (13, 244) | 1.16 | 0.307   |
| HEIGHT*EXPOSURE*TIME    | (13, 244) | 1.09 | 0.367   |
| ETHNICITY*EXPOSURE*TIME | (13, 244) | 0.84 | 0.619   |
| ATOPY*EXPOSURE*TIME     | (13, 245) | 0.72 | 0.740   |
| STEROID*EXPOSURE*TIME   | (13, 245) | 0.65 | 0.810   |
| TOLERANCE*EXPOSURE*TIME | (13, 244) | 0.62 | 0.837   |
| EXERCISE*EXPOSURE*TIME  | (13, 245) | 1.29 | 0.220   |
| TRAFFIC*EXPOSURE*TIME   | (26, 233) | 0.87 | 0.647   |
| <b>FVC</b>              |           |      |         |
| AGE*EXPOSURE*TIME       | (13, 243) | 0.97 | 0.487   |
| SEX*EXPOSURE*TIME       | (13, 243) | 0.29 | 0.993   |
| HEIGHT*EXPOSURE*TIME    | (13, 242) | 1.11 | 0.352   |
| ETHNICITY*EXPOSURE*TIME | (13, 243) | 1.31 | 0.209   |
| ATOPY*EXPOSURE*TIME     | (13, 244) | 0.54 | 0.900   |
| STEROID*EXPOSURE*TIME   | (13, 244) | 1.03 | 0.420   |
| TOLERANCE*EXPOSURE*TIME | (13, 243) | 0.92 | 0.535   |
| EXERCISE*EXPOSURE*TIME  | (13, 244) | 0.96 | 0.489   |
| TRAFFIC*EXPOSURE*TIME   | (26, 232) | 1.08 | 0.368   |
| <b>FEF</b>              |           |      |         |
| AGE*EXPOSURE*TIME       | (13, 243) | 2.88 | <0.001  |
| SEX*EXPOSURE*TIME       | (13, 243) | 1.03 | 0.418   |
| HEIGHT*EXPOSURE*TIME    | (13, 242) | 0.81 | 0.649   |
| ETHNICITY*EXPOSURE*TIME | (13, 243) | 1.03 | 0.420   |
| ATOPY*EXPOSURE*TIME     | (13, 244) | 0.82 | 0.634   |
| STEROID*EXPOSURE*TIME   | (13, 244) | 0.96 | 0.497   |
| TOLERANCE*EXPOSURE*TIME | (13, 243) | 0.76 | 0.704   |
| EXERCISE*EXPOSURE*TIME  | (26, 244) | 0.42 | 0.964   |
| TRAFFIC*EXPOSURE*TIME   | (26, 232) | 1.15 | 0.284   |
| <b>FE<sub>No</sub></b>  |           |      |         |
| AGE*EXPOSURE*TIME       | (13, 252) | 1.99 | 0.022   |

|                                     |           |      |       |
|-------------------------------------|-----------|------|-------|
| SEX*EXPOSURE*TIME                   | (13, 252) | 0.69 | 0.774 |
| HEIGHT*EXPOSURE*TIME                | (13, 251) | 1.11 | 0.350 |
| ETHNICITY*EXPOSURE*TIME             | (13, 252) | 1.41 | 0.153 |
| ATOPY*EXPOSURE*TIME                 | (13, 253) | 1.89 | 0.032 |
| STEROID*EXPOSURE*TIME               | (13, 253) | 0.82 | 0.636 |
| TOLERANCE*EXPOSURE*TIME             | (13, 252) | 1.23 | 0.259 |
| EXERCISE*EXPOSURE*TIME              | (13, 253) | 1.12 | 0.343 |
| TRAFFIC*EXPOSURE*TIME               | (26, 241) | 0.54 | 0.970 |
| <b>Exhaled breath condensate pH</b> |           |      |       |
| AGE*EXPOSURE*TIME                   | (5, 83)   | 0.66 | 0.651 |
| SEX*EXPOSURE*TIME                   | (5, 83)   | 0.43 | 0.827 |
| HEIGHT*EXPOSURE*TIME                | (5, 83)   | 0.23 | 0.947 |
| ETHNICITY*EXPOSURE*TIME             | (5, 83)   | 0.81 | 0.544 |
| ATOPY*EXPOSURE*TIME                 | (5, 84)   | 0.95 | 0.453 |
| STEROID*EXPOSURE*TIME               | (5, 84)   | 0.55 | 0.739 |
| TOLERANCE*EXPOSURE*TIME             | (5, 83)   | 0.99 | 0.426 |
| EXERCISE*EXPOSURE*TIME              | (5, 84)   | 0.4  | 0.845 |
| TRAFFIC*EXPOSURE*TIME               | (10, 80)  | 0.92 | 0.522 |
| <b>Myeloperoxidase</b>              |           |      |       |
| AGE*EXPOSURE                        | (1, 12)   | 0.77 | 0.398 |
| SEX*EXPOSURE                        | (1, 13)   | 1.3  | 0.275 |
| HEIGHT*EXPOSURE                     | (1, 13)   | 0.03 | 0.862 |
| ETHNICITY*EXPOSURE                  | (1, 13)   | 2.72 | 0.123 |
| ATOPY*EXPOSURE                      | (1, 13)   | 0.1  | 0.758 |
| STEROID*EXPOSURE                    | (1, 13)   | 0.34 | 0.569 |
| TOLERANCE*EXPOSURE                  | (1, 13)   | 4.45 | 0.055 |
| EXERCISE*EXPOSURE                   | (2, 13)   | 0.01 | 0.915 |
| TRAFFIC*EXPOSURE                    | (2, 12)   | 0.27 | 0.771 |
| <b>Neutrophils</b>                  |           |      |       |
| AGE*EXPOSURE                        | (1, 6)    | 0.45 | 0.528 |
| SEX*EXPOSURE                        | (1, 6)    | 0    | 0.975 |
| HEIGHT*EXPOSURE                     | (1, 6)    | 0.14 | 0.723 |
| ETHNICITY*EXPOSURE                  | (1, 6)    | 0.16 | 0.706 |
| ATOPY*EXPOSURE                      | (1, 6)    | 3.72 | 0.102 |
| STEROID*EXPOSURE                    | (1, 6)    | 0.05 | 0.835 |
| TOLERANCE*EXPOSURE                  | (1, 6)    | 0.16 | 0.700 |
| EXERCISE*EXPOSURE                   | (1, 6)    | 0    | 0.970 |
| TRAFFIC*EXPOSURE                    | (2, 5)    | 0.06 | 0.946 |
| <b>IL-8</b>                         |           |      |       |
| AGE*EXPOSURE                        | (1, 12)   | 0.73 | 0.409 |
| SEX*EXPOSURE                        | (1, 13)   | 0.44 | 0.519 |
| HEIGHT*EXPOSURE                     | (1, 13)   | 4.81 | 0.047 |
| ETHNICITY*EXPOSURE                  | (1, 13)   | 1.04 | 0.327 |
| ATOPY*EXPOSURE                      | (1, 13)   | 0.38 | 0.549 |
| STEROID*EXPOSURE                    | (1, 13)   | 0.13 | 0.726 |
| TOLERANCE*EXPOSURE                  | (1, 13)   | 0    | 0.987 |
| EXERCISE*EXPOSURE                   | (1, 13)   | 0.02 | 0.882 |
| TRAFFIC*EXPOSURE                    | (2, 12)   | 0.64 | 0.544 |

**Table A3i. Point estimates and 95% confidence intervals(CI) of the percent change in health endpoints per 10,000 particles/cm<sup>3</sup> incremental change in ultrafine particle concentrations averaged over the exposure and control sessions. Point estimates are adjusted for EC, PM<sub>2.5</sub>, and NO<sub>2</sub>, respectively**

| Endpoint at time=t hours    | Single Pollutant Model |        |       |              | EC             |        |       |                  | PM <sub>2.5</sub> |        |       |              | NO <sub>2</sub> |        |       |              |
|-----------------------------|------------------------|--------|-------|--------------|----------------|--------|-------|------------------|-------------------|--------|-------|--------------|-----------------|--------|-------|--------------|
|                             | Point estimate         | 95% CI |       | p            | Point estimate | 95% CI |       | p                | Point estimate    | 95% CI |       | p            | Point estimate  | 95% CI |       | p            |
|                             |                        | Lower  | Upper |              |                | Lower  | Upper |                  |                   | Lower  | Upper |              |                 | Lower  | Upper |              |
| <b>FEV<sub>1</sub></b>      |                        |        |       |              |                |        |       |                  |                   |        |       |              |                 |        |       |              |
| 2                           | -0.79                  | -1.25  | -0.33 | <b>0.001</b> | -1.15          | -2.09  | -0.21 | <b>0.016</b>     | -0.74             | -1.33  | -0.15 | <b>0.014</b> | -0.7            | -1.31  | -0.1  | <b>0.023</b> |
| 3                           | -0.73                  | -1.24  | -0.21 | <b>0.006</b> | -0.66          | -1.69  | 0.37  | 0.209            | -0.75             | -1.4   | -0.1  | <b>0.023</b> | -0.84           | -1.51  | -0.18 | <b>0.013</b> |
| 5                           | -0.90                  | -1.46  | -0.34 | <b>0.002</b> | -0.98          | -2.09  | 0.13  | 0.082            | -0.77             | -1.47  | -0.07 | <b>0.031</b> | -1.01           | -1.73  | -0.29 | <b>0.006</b> |
| 7                           | -0.66                  | -1.24  | -0.08 | <b>0.026</b> | -0.88          | -2.01  | 0.25  | 0.125            | -0.55             | -1.27  | 0.16  | 0.131        | -0.74           | -1.48  | -0.01 | <b>0.047</b> |
| 22                          | -0.44                  | -1.04  | 0.15  | 0.141        | -1.41          | -2.55  | -0.27 | <b>0.016</b>     | -0.56             | -1.29  | 0.16  | 0.129        | -0.48           | -1.23  | 0.26  | 0.199        |
| <b>FVC</b>                  |                        |        |       |              |                |        |       |                  |                   |        |       |              |                 |        |       |              |
| 2                           | -0.56                  | -1.11  | -0.01 | <b>0.046</b> | -1.1           | -2.21  | 0.01  | 0.051            | -0.69             | -1.41  | 0.02  | 0.057        | -0.67           | -1.41  | 0.06  | 0.072        |
| 3                           | -0.61                  | -1.21  | 0.00  | <b>0.049</b> | -1.03          | -2.2   | 0.14  | 0.084            | -0.83             | -1.59  | -0.06 | <b>0.034</b> | -0.92           | -1.7   | -0.13 | <b>0.022</b> |
| 5                           | -0.71                  | -1.37  | -0.06 | <b>0.032</b> | -1.22          | -2.43  | -0.02 | <b>0.047</b>     | -0.82             | -1.62  | -0.02 | <b>0.045</b> | -1.14           | -1.96  | -0.32 | <b>0.007</b> |
| 7                           | -0.34                  | -1.01  | 0.33  | 0.317        | -1.66          | -2.87  | -0.44 | <b>0.008</b>     | -0.37             | -1.18  | 0.44  | 0.375        | -0.53           | -1.36  | 0.3   | 0.207        |
| 22                          | -0.42                  | -1.10  | 0.26  | 0.223        | -2.24          | -3.46  | -1.03 | <b>&lt;0.001</b> | -0.81             | -1.63  | -0.01 | <b>0.050</b> | -0.78           | -1.62  | 0.05  | 0.065        |
| <b>FEF<sub>25-75%</sub></b> |                        |        |       |              |                |        |       |                  |                   |        |       |              |                 |        |       |              |
| 2                           | -2.24                  | -3.94  | -0.54 | <b>0.010</b> | -1.71          | -4.91  | 1.5   | 0.297            | -1.47             | -3.75  | 0.82  | 0.207        | -1.57           | -3.96  | 0.83  | 0.199        |
| 3                           | -2.22                  | -4.12  | -0.32 | <b>0.022</b> | -0.24          | -3.46  | 2.97  | 0.883            | -1.11             | -3.45  | 1.22  | 0.350        | -1.38           | -3.8   | 1.05  | 0.266        |
| 5                           | -2.81                  | -4.88  | -0.73 | <b>0.008</b> | -1.54          | -4.75  | 1.68  | 0.348            | -1.45             | -3.8   | 0.9   | 0.227        | -1.85           | -4.28  | 0.59  | 0.137        |
| 7                           | -2.12                  | -4.27  | 0.02  | 0.053        | 0.18           | -3.04  | 3.39  | 0.914            | -1.33             | -3.68  | 1.03  | 0.268        | -1.56           | -4     | 0.87  | 0.208        |
| 22                          | -1.71                  | -3.91  | 0.48  | 0.125        | -0.47          | -3.69  | 2.75  | 0.774            | -1.21             | -3.56  | 1.15  | 0.314        | -0.75           | -3.19  | 1.68  | 0.544        |
| <b>FE<sub>NO</sub></b>      |                        |        |       |              |                |        |       |                  |                   |        |       |              |                 |        |       |              |
| 3                           | 1.01                   | -1.11  | 3.12  | 0.350        | -0.81          | -4.13  | 2.52  | 0.633            | -0.16             | -2.2   | 1.89  | 0.881        | -0.7            | -2.82  | 1.42  | 0.517        |
| 4                           | 0.73                   | -1.58  | 3.05  | 0.534        | -3.07          | -6.64  | 0.51  | 0.093            | 0.36              | -1.83  | 2.54  | 0.748        | -0.4            | -2.67  | 1.88  | 0.731        |
| 5                           | 1.74                   | -0.72  | 4.19  | 0.166        | -1.82          | -5.56  | 1.92  | 0.340            | 1.66              | -0.61  | 3.93  | 0.152        | 0.66            | -1.72  | 3.03  | 0.587        |
| 6                           | 1.13                   | -1.44  | 3.70  | 0.388        | -3.27          | -7.12  | 0.58  | 0.096            | 0.57              | -1.76  | 2.9   | 0.630        | 0.91            | -1.53  | 3.35  | 0.463        |
| 7                           | 0.89                   | -1.76  | 3.54  | 0.510        | -2.72          | -6.65  | 1.21  | 0.174            | 0.53              | -1.84  | 2.89  | 0.662        | 0.09            | -2.39  | 2.58  | 0.943        |
| 22                          | 1.62                   | -1.30  | 4.53  | 0.276        | -0.94          | -5.04  | 3.16  | 0.653            | 1.13              | -1.31  | 3.56  | 0.365        | 1.81            | -0.77  | 4.39  | 0.168        |
| <b>pH</b>                   |                        |        |       |              |                |        |       |                  |                   |        |       |              |                 |        |       |              |
| 3                           | -0.32                  | -0.58  | -0.05 | <b>0.018</b> | -0.56          | -1.09  | -0.04 | <b>0.037</b>     | -0.37             | -0.7   | -0.04 | <b>0.029</b> | -0.07           | -0.39  | 0.26  | 0.690        |
| 6                           | -0.10                  | -0.38  | 0.19  | 0.515        | -0.35          | -0.94  | 0.25  | 0.250            | -0.09             | -0.46  | 0.282 | 0.639        | 0.06            | -0.3   | 0.42  | 0.740        |

**Table A3ii. Point estimates and 95% confidence intervals(CI) of the percent change in health endpoints per 1µg/m<sup>3</sup> incremental change in elemental carbon concentrations averaged over the exposure and control sessions. Point estimates are adjusted for UFP, PM<sub>2.5</sub>, and NO<sub>2</sub>, respectively**

| Endpoint at time=t hours    | Single Pollutant Model |        |       |              | UFP            |        |       |              | PM <sub>2.5</sub> |        |       |              | NO <sub>2</sub> |        |       |              |
|-----------------------------|------------------------|--------|-------|--------------|----------------|--------|-------|--------------|-------------------|--------|-------|--------------|-----------------|--------|-------|--------------|
|                             | Point estimate         | 95% CI |       | p            | Point estimate | 95% CI |       | p            | Point estimate    | 95% CI |       | p            | Point estimate  | 95% CI |       | p            |
|                             |                        | Lower  | Upper |              |                | Lower  | Upper |              |                   | Lower  | Upper |              |                 | Lower  | Upper |              |
| <b>FEV<sub>1</sub></b>      |                        |        |       |              |                |        |       |              |                   |        |       |              |                 |        |       |              |
| 2                           | -0.36                  | -0.63  | -0.09 | <b>0.010</b> | 0.2            | -0.33  | 0.74  | 0.456        | -0.25             | -0.6   | 0.1   | 0.164        | -0.31           | -0.64  | 0.02  | 0.068        |
| 3                           | -0.42                  | -0.72  | -0.12 | <b>0.007</b> | -0.09          | -0.68  | 0.5   | 0.755        | -0.37             | -0.76  | 0.02  | 0.064        | -0.45           | -0.82  | -0.09 | <b>0.016</b> |
| 5                           | -0.49                  | -0.81  | -0.16 | <b>0.004</b> | -0.01          | -0.64  | 0.63  | 0.988        | -0.34             | -0.75  | 0.09  | 0.124        | -0.53           | 0.93   | -0.14 | <b>0.008</b> |
| 7                           | -0.33                  | -0.67  | 0.00  | 0.053        | 0.1            | -0.55  | 0.75  | 0.764        | -0.17             | -0.6   | 0.26  | 0.446        | -0.37           | -0.77  | 0.03  | 0.071        |
| 22                          | -0.12                  | -0.46  | 0.23  | 0.497        | 0.57           | -0.08  | 1.23  | 0.087        | -0.04             | -0.48  | 0.39  | 0.846        | -0.14           | -0.54  | 0.27  | 0.513        |
| <b>FVC</b>                  |                        |        |       |              |                |        |       |              |                   |        |       |              |                 |        |       |              |
| 2                           | -0.26                  | -0.57  | 0.06  | 0.111        | 0.28           | -0.35  | 0.92  | 0.384        | -0.24             | -0.66  | 0.18  | 0.257        | -0.29           | -0.69  | 0.1   | 0.148        |
| 3                           | -0.32                  | -0.66  | 0.02  | 0.066        | 0.18           | -0.49  | 0.86  | 0.590        | -0.35             | -0.79  | 0.1   | 0.126        | -0.47           | -0.89  | -0.05 | <b>0.029</b> |
| 5                           | -0.35                  | -0.72  | 0.01  | 0.059        | 0.25           | -0.44  | 0.94  | 0.482        | -0.31             | -0.77  | 0.15  | 0.185        | -0.56           | -0.99  | -0.12 | <b>0.012</b> |
| 7                           | 0.00                   | -0.37  | 0.37  | 0.986        | 0.82           | 0.12   | 1.51  | <b>0.022</b> | 0.16              | -0.31  | 0.62  | 0.506        | -0.1            | -0.54  | 0.33  | 0.644        |
| 22                          | 0.04                   | -0.33  | 0.41  | 0.841        | 1.14           | 0.44   | 1.83  | <b>0.001</b> | 0.02              | -0.44  | 0.48  | 0.933        | -0.08           | -0.52  | 0.35  | 0.705        |
| <b>FEF<sub>25-75%</sub></b> |                        |        |       |              |                |        |       |              |                   |        |       |              |                 |        |       |              |
| 2                           | -0.74                  | -1.65  | 0.18  | 0.116        | 0.1            | -1.74  | 1.94  | 0.917        | -0.44             | -1.64  | 0.76  | 0.467        | -0.5            | -1.65  | 0.65  | 0.394        |
| 3                           | -0.87                  | -1.85  | 0.12  | 0.084        | -0.75          | -2.59  | 1.1   | 0.427        | -0.51             | -1.72  | 0.69  | 0.404        | -0.52           | -1.67  | 0.63  | 0.377        |
| 5                           | -1.12                  | -2.14  | -0.10 | <b>0.031</b> | -0.37          | -2.22  | 1.48  | 0.695        | -0.5              | -1.7   | 0.71  | 0.419        | -0.71           | -1.86  | 0.44  | 0.227        |
| 7                           | -1.11                  | -2.14  | -0.08 | <b>0.034</b> | -1.2           | -3.04  | 0.65  | 0.203        | -0.85             | -2.05  | 0.36  | 0.168        | -0.9            | -2.05  | 0.25  | 0.124        |
| 22                          | -0.75                  | -1.78  | 0.28  | 0.152        | -0.52          | -2.37  | 1.33  | 0.581        | -0.64             | -1.84  | 0.57  | 0.300        | -0.44           | -1.59  | 0.71  | 0.455        |
| <b>FE<sub>NO</sub></b>      |                        |        |       |              |                |        |       |              |                   |        |       |              |                 |        |       |              |
| 3                           | 1.63                   | 0.41   | 2.85  | <b>0.009</b> | 0.69           | -1.22  | 2.6   | 0.478        | 0.09              | -1.17  | 1.35  | 0.891        | -0.24           | -1.43  | 0.95  | 0.690        |
| 4                           | 1.91                   | 0.57   | 3.25  | <b>0.005</b> | 2.08           | 0.03   | 4.14  | <b>0.047</b> | 1.02              | -0.35  | 2.4   | 0.144        | 0.47            | -0.83  | 1.77  | 0.478        |
| 5                           | 2.37                   | 0.95   | 3.79  | <b>0.001</b> | 1.93           | -0.22  | 4.08  | 0.079        | 1.68              | 0.23   | 3.13  | <b>0.024</b> | 0.91            | -0.47  | 2.29  | 0.196        |
| 6                           | 2.18                   | 0.70   | 3.67  | <b>0.004</b> | 2.45           | 0.24   | 4.67  | <b>0.030</b> | 1.31              | -0.2   | 2.82  | 0.090        | 1.05            | -0.39  | 2.49  | 0.153        |
| 7                           | 1.92                   | 0.39   | 3.46  | <b>0.014</b> | 1.92           | -0.34  | 4.18  | 0.095        | 1.07              | -0.49  | 2.62  | 0.178        | 0.5             | -0.99  | 1.98  | 0.513        |
| 22                          | 1.97                   | 0.28   | 3.65  | <b>0.022</b> | 1.09           | -1.27  | 3.44  | 0.365        | 1.02              | -0.66  | 2.71  | 0.234        | 0.85            | -0.78  | 2.48  | 0.304        |
| <b>pH</b>                   |                        |        |       |              |                |        |       |              |                   |        |       |              |                 |        |       |              |
| 3                           | -0.10                  | -0.26  | 0.06  | 0.210        | 0.18           | -0.13  | 0.48  | 0.250        | -0.11             | -0.31  | 0.09  | 0.285        | 0.01            | -0.17  | 0.19  | 0.947        |
| 6                           | <0.01                  | -0.17  | 0.17  | 0.985        | 0.17           | -0.09  | 0.51  | 0.318        | 0.02              | -0.2   | 0.25  | 0.839        | 0.06            | -0.14  | 0.26  | 0.544        |

**Table A3iii. Point estimates and 95% confidence intervals(CI) of the percent change in health endpoints per 10µg/m<sup>3</sup> incremental change in PM<sub>2.5</sub> concentrations averaged over the exposure and control sessions. Point estimates are adjusted for UFP, PM<sub>2.5</sub>, and NO<sub>2</sub>, respectively.**

| Endpoint at time=t hours    | Single Pollutant Model |        |       |              | UFP            |        |       |              | EC             |        |       |       | NO <sub>2</sub> |        |       |              |  |
|-----------------------------|------------------------|--------|-------|--------------|----------------|--------|-------|--------------|----------------|--------|-------|-------|-----------------|--------|-------|--------------|--|
|                             | Point estimate         | 95% CI |       | p            | Point estimate | 95% CI |       | p            | Point estimate | 95% CI |       | p     | Point estimate  | 95% CI |       | p            |  |
|                             |                        | Lower  | Upper |              |                | Lower  | Upper |              |                | Lower  | Upper |       |                 | Lower  | Upper |              |  |
| <b>FEV<sub>1</sub></b>      |                        |        |       |              |                |        |       |              |                |        |       |       |                 |        |       |              |  |
| 2                           | -0.65                  | -1.52  | 0.21  | 0.139        | 0.03           | -1.03  | 1.1   | 0.948        | -0.39          | -1.5   | 0.71  | 0.487 | -0.57           | -1.6   | 0.45  | 0.273        |  |
| 3                           | -0.46                  | -1.43  | 0.51  | 0.349        | 0.24           | -0.94  | 1.41  | 0.694        | -0.06          | -1.27  | 1.16  | 0.928 | -0.48           | -1.61  | 0.66  | 0.410        |  |
| 5                           | -0.89                  | -1.96  | 0.18  | 0.103        | -0.17          | -1.44  | 1.09  | 0.789        | -0.61          | -1.92  | 0.7   | 0.363 | -0.86           | -2.11  | 0.35  | 0.163        |  |
| 7                           | -0.39                  | -1.50  | 0.72  | 0.490        | 0.13           | -1.17  | 1.42  | 0.850        | -0.32          | -1.66  | 1.03  | 0.643 | -0.44           | -1.71  | 0.82  | 0.49         |  |
| 22                          | -0.08                  | -1.22  | 1.05  | 0.885        | 0.44           | -0.87  | 1.75  | 0.511        | -0.32          | -1.68  | 1.04  | 0.642 | 0.13            | -1.15  | 1.41  | 0.839        |  |
| <b>FVC</b>                  |                        |        |       |              |                |        |       |              |                |        |       |       |                 |        |       |              |  |
| 2                           | -0.25                  | -1.30  | 0.79  | 0.635        | 0.4            | -0.9   | 1.69  | 0.546        | -0.16          | -1.48  | 1.16  | 0.809 | -0.25           | -1.51  | 1.01  | 0.634        |  |
| 3                           | 0.07                   | -1.08  | 1.22  | 0.911        | 0.84           | -0.55  | 2.22  | 0.237        | 0.24           | -1.16  | 1.63  | 0.738 | 0.07            | -1.29  | 1.42  | 0.924        |  |
| 5                           | -0.23                  | -1.47  | 1.01  | 0.715        | 0.54           | -0.92  | 1.99  | 0.470        | -0.1           | -1.54  | 1.34  | 0.893 | -0.47           | -1.88  | 0.94  | 0.512        |  |
| 7                           | 0.11                   | -1.16  | 1.38  | 0.865        | 0.45           | -1.02  | 1.92  | 0.547        | -0.4           | -1.85  | 1.05  | 0.585 | -0.01           | -1.44  | 1.41  | 0.985        |  |
| 22                          | 0.75                   | -0.54  | 2.03  | 0.254        | 1.5            | 0.03   | 2.97  | <b>0.046</b> | 0.41           | -1.04  | 1.87  | 0.576 | 0.95            | -0.57  | 2.28  | 0.239        |  |
| <b>FEF<sub>25-75%</sub></b> |                        |        |       |              |                |        |       |              |                |        |       |       |                 |        |       |              |  |
| 2                           | -3.36                  | -6.58  | -0.15 | <b>0.041</b> | -2             | -6.12  | 2.13  | 0.343        | -0.71          | -4.46  | 3.04  | 0.710 | -2.92           | -6.99  | 1.15  | 0.159        |  |
| 3                           | -4.81                  | -8.41  | -1.21 | <b>0.009</b> | -0.377         | -8     | 0.45  | 0.080        | -1.59          | -5.35  | 2.17  | 0.406 | -4.39           | -8.54  | -0.23 | <b>0.039</b> |  |
| 5                           | -5.63                  | -9.59  | -1.66 | <b>0.006</b> | -4.28          | -8.53  | -0.02 | 0.049        | -2.88          | -6.64  | 0.88  | 0.133 | -4.71           | -8.89  | -0.53 | <b>0.027</b> |  |
| 7                           | -3.34                  | -7.44  | 0.77  | 0.111        | -2.1           | -6.36  | 2.16  | 0.333        | -0.54          | -4.3   | 3.22  | 0.778 | -2.91           | -7.09  | 1.27  | 0.172        |  |
| 22                          | -3.20                  | -7.41  | 1.01  | 0.136        | -2.05          | -6.31  | 2.21  | 0.345        | -0.89          | -4.65  | 2.88  | 0.645 | -2.08           | -6.26  | 2.1   | 0.329        |  |
| <b>FE<sub>NO</sub></b>      |                        |        |       |              |                |        |       |              |                |        |       |       |                 |        |       |              |  |
| 3                           | 0.98                   | -2.96  | 4.92  | 0.626        | 0.74           | -2.93  | 4.41  | 0.692        | 0.82           | -3.06  | 4.71  | 0.677 | -0.89           | -4.53  | 2.76  | 0.633        |  |
| 4                           | -0.79                  | -5.09  | 3.52  | 0.720        | -1.51          | -5.42  | 2.41  | 0.450        | -2.29          | -6.53  | 1.94  | 0.288 | -2.04           | -6.02  | 1.93  | 0.313        |  |
| 5                           | 0.05                   | -4.53  | 4.62  | 0.985        | -1.91          | -5.98  | 2.17  | 0.358        | -2.51          | -7     | 1.98  | 0.273 | -1.55           | -5.76  | 2.65  | 0.468        |  |
| 6                           | -0.16                  | -4.92  | 4.61  | 0.949        | -1.08          | -5.25  | 3.1   | 0.612        | -2.26          | -6.93  | 2.41  | 0.342 | -0.76           | -5.13  | 3.61  | 0.734        |  |
| 7                           | -0.54                  | -5.45  | 4.37  | 0.828        | -1.43          | -5.67  | 2.81  | 0.510        | -2.25          | -7.05  | 2.55  | 0.358 | -1.65           | -6.15  | 2.84  | 0.471        |  |
| 22                          | 1.89                   | -3.48  | 7.25  | 0.490        | 0.44           | -3.93  | 4.81  | 0.844        | -0.18          | -5.38  | 5.02  | 0.945 | 1.6             | -3.25  | 6.46  | 0.517        |  |
| <b>pH</b>                   |                        |        |       |              |                |        |       |              |                |        |       |       |                 |        |       |              |  |
| 3                           | -0.24                  | -0.75  | 0.27  | 0.352        | 0.11           | -0.49  | 0.7   | 0.720        | 0.01           | -0.62  | 0.63  | 0.988 | 0.21            | -0.34  | 0.76  | 0.459        |  |
| 6                           | -0.17                  | -0.73  | 0.38  | 0.534        | -0.09          | -0.75  | 0.57  | 0.785        | -0.19          | -0.88  | 0.5   | 0.587 | 0.08            | -0.52  | 0.68  | 0.795        |  |

**Table A3iv. Point estimates and 95% confidence intervals(CI) of the percent change in health endpoints per 10µg/m<sup>3</sup> incremental change in NO<sub>2</sub> concentrations averaged over the exposure and control sessions. Point estimates are adjusted for UFP, PM<sub>2.5</sub>, and NO<sub>2</sub>, respectively**

| Endpoint at time=t hours    | Single Pollutant Model |        |       |              | UFP            |        |       |             | PM <sub>2.5</sub> |        |       |                  | EC             |        |       |              |
|-----------------------------|------------------------|--------|-------|--------------|----------------|--------|-------|-------------|-------------------|--------|-------|------------------|----------------|--------|-------|--------------|
|                             | Point estimate         | 95% CI |       | p            | Point estimate | 95% CI |       | p           | Point estimate    | 95% CI |       | p                | Point estimate | 95% CI |       | p            |
|                             |                        | Lower  | Upper |              |                | Lower  | Upper |             |                   | Lower  | Upper |                  |                | Lower  | Upper |              |
| <b>FEV<sub>1</sub></b>      |                        |        |       |              |                |        |       |             |                   |        |       |                  |                |        |       |              |
| 2                           | -0.22                  | -0.40  | -0.05 | <b>0.012</b> | -0.08          | -0.3   | 0.13  | 0.448       | -0.15             | -0.36  | 0.05  | 0.148            | -0.18          | -0.37  | 0.02  | 0.079        |
| 3                           | -0.12                  | -0.32  | 0.07  | 0.217        | 0.04           | -0.19  | 0.28  | 0.717       | -0.09             | -0.31  | 0.14  | 0.464            | -0.05          | -0.27  | 0.17  | 0.646        |
| 5                           | -0.16                  | -0.37  | 0.06  | 0.152        | 0.04           | -0.21  | 0.3   | 0.740       | -0.07             | -0.31  | 0.18  | 0.598            | -0.07          | -0.31  | 0.16  | 0.544        |
| 7                           | -0.11                  | -0.34  | 0.11  | 0.310        | 0.03           | -0.23  | 0.3   | 0.808       | -0.06             | -0.31  | 0.19  | 0.642            | -0.06          | -0.3   | 0.18  | 0.614        |
| 22                          | -0.13                  | -0.35  | 0.10  | 0.270        | -0.03          | -0.3   | 0.24  | 0.821       | -0.15             | -0.4   | 0.11  | 0.264            | -0.14          | -0.38  | 0.1   | 0.256        |
| <b>FVC</b>                  |                        |        |       |              |                |        |       |             |                   |        |       |                  |                |        |       |              |
| 2                           | -0.09                  | -0.30  | 0.11  | 0.376        | 0.04           | -0.23  | 0.3   | 0.782       | -0.07             | -0.32  | 0.18  | 0.588            | -0.07          | -0.31  | 0.16  | 0.535        |
| 3                           | -0.07                  | -0.30  | 0.16  | 0.549        | 0.11           | -0.17  | 0.39  | 0.440       | -0.05             | -0.32  | 0.22  | 0.717            | -0.02          | -0.27  | 0.23  | 0.855        |
| 5                           | -0.04                  | -0.29  | 0.21  | 0.761        | 0.19           | -0.11  | 0.48  | 0.214       | 0.04              | -0.24  | 0.33  | 0.768            | 0.03           | -0.23  | 0.29  | 0.806        |
| 7                           | -0.06                  | -0.31  | 0.20  | 0.666        | 0.05           | -0.25  | 0.35  | 0.742       | -0.03             | -0.32  | 0.25  | 0.811            | -0.07          | -0.33  | 0.19  | 0.601        |
| 22                          | -0.02                  | -0.28  | 0.23  | 0.863        | 0.13           | -0.17  | 0.43  | 0.390       | -0.07             | -0.36  | 0.21  | 0.620            | -0.05          | -0.31  | 0.21  | 0.713        |
| <b>FEF<sub>25-75%</sub></b> |                        |        |       |              |                |        |       |             |                   |        |       |                  |                |        |       |              |
| 2                           | -0.78                  | -1.44  | -0.13 | <b>0.019</b> | -0.47          | -1.33  | 0.39  | 0.282       | -0.48             | -1.3   | 0.34  | 0.251            | -0.43          | -1.11  | 0.26  | 0.221        |
| 3                           | -0.73                  | -1.46  | 0.00  | 0.051        | -0.45          | -1.33  | 0.42  | 0.309       | -0.5              | -1.34  | 0.33  | 0.236            | -0.3           | -0.98  | 0.39  | 0.393        |
| 5                           | -0.88                  | -1.69  | -0.08 | <b>0.031</b> | -0.52          | -1.4   | 0.36  | 0.247       | -0.55             | -1.39  | 0.29  | 0.199            | -0.47          | -1.15  | 0.22  | 0.181        |
| 7                           | -0.60                  | -1.43  | 0.23  | 0.155        | -0.29          | -1.17  | 0.59  | 0.515       | -0.37             | -1.21  | 0.47  | 0.391            | -0.22          | -0.9   | 0.46  | 0.529        |
| 22                          | -0.75                  | -1.60  | 0.10  | 0.084        | -0.59          | -1.47  | 0.29  | 0.190       | -0.66             | -1.5   | 0.18  | 0.124            | -0.49          | -1.18  | 0.2   | 0.162        |
| <b>FE<sub>NO</sub></b>      |                        |        |       |              |                |        |       |             |                   |        |       |                  |                |        |       |              |
| 3                           | 0.53                   | -0.27  | 1.32  | 0.191        | 0.36           | -0.41  | 1.12  | 0.363       | 0.42              | -0.32  | 1.16  | 0.270            | 0.32           | -0.39  | 1.03  | 0.378        |
| 4                           | 0.30                   | -0.57  | 1.17  | 0.498        | 0.07           | -0.76  | 0.89  | 0.876       | 0.32              | -0.49  | 1.13  | 0.440            | -0.04          | -0.81  | 0.74  | 0.925        |
| 5                           | 0.47                   | -0.45  | 1.40  | 0.315        | 0.03           | -0.83  | 0.88  | 0.953       | 0.45              | -0.41  | 1.3   | 0.303            | 0.04           | -0.78  | 0.87  | 0.916        |
| 6                           | 0.00                   | -0.97  | 0.96  | 0.994        | -0.5           | -1.38  | 0.38  | 0.263       | -0.2              | -1.09  | 0.69  | 0.660            | -0.49          | -1.35  | 0.36  | 0.258        |
| 7                           | 0.11                   | -0.88  | 1.11  | 0.827        | -0.22          | -1.12  | 0.67  | 0.626       | 0.03              | -0.88  | 0.95  | 0.941            | -0.25          | -1.14  | 0.63  | 0.573        |
| 22                          | -0.07                  | -1.16  | 1.03  | 0.906        | -0.74          | -1.68  | 0.19  | 0.116       | -0.38             | -1.36  | 0.61  | 0.455            | -0.59          | -1.56  | 0.38  | 0.233        |
| <b>pH</b>                   |                        |        |       |              |                |        |       |             |                   |        |       |                  |                |        |       |              |
| 3                           | -0.15                  | -0.25  | -0.06 | <b>0.002</b> | -0.14          | -0.26  | -0.02 | <b>0.02</b> | -0.19             | -0.3   | -0.08 | <b>&lt;0.001</b> | -0.15          | -0.25  | -0.04 | <b>0.007</b> |
| 6                           | -0.06                  | -0.16  | 0.04  | 0.246        | -0.07          | -0.2   | 0.06  | 0.27        | -0.09             | -0.21  | 0.04  | 0.164            | -0.07          | -0.19  | 0.05  | 0.230        |







**Table 4ii. Individual measurements of lung function (%predicted values) before and after each exposure session.**  
**FEV=forced expiratory volume in 1 second**  
**FEF = mid-expiratory flow**  
**FVC = forced vital capacity**

| id | Exposure  | Before exposure |      |      |          |      |      | After exposure |      |      |          |      |      |          |      |      |          |      |      |          |      |      |           |     |     |
|----|-----------|-----------------|------|------|----------|------|------|----------------|------|------|----------|------|------|----------|------|------|----------|------|------|----------|------|------|-----------|-----|-----|
|    |           | -2 hours        |      |      | +0 hours |      |      | +1 hour        |      |      | +2 hours |      |      | +3 hours |      |      | +5 hours |      |      | +7 hours |      |      | +22 hours |     |     |
|    |           | FEV             | FEF  | FVC  | FEV      | FEF  | FVC  | FEV            | FEF  | FVC  | FEV      | FEF  | FVC  | FEV      | FEF  | FVC  | FEV      | FEF  | FVC  | FEV      | FEF  | FVC  | FEV       | FEF | FVC |
| 1  | HYDE PARK | 87.4            | 70.7 | 90.3 | 84.1     | 64   | 88   | 82.7           | 59   | 89   | 83.1     | 64.5 | 86.5 | 86.2     | 66.9 | 91.8 | 89.2     | 73.9 | 92.6 | 90       | 76.3 | 92.7 | 85.5      | 68  | 90  |
| 2  | HYDE PARK | 71.2            | 34.4 | 86   | 72.6     | 19   | 102  | 71.2           | 40   | 80   | 69.5     | 25.7 | 90.5 | 75.4     | 48.5 | 82.7 | 75.3     | 46.4 | 83.9 | 73.1     | 36.7 | 87.5 | 70        | 37  | 82  |
| 3  | HYDE PARK | 91.9            | 57   | 110  | 99.4     | 59   | 119  | 98.1           | 58   | 117  | 94.1     | 54.8 | 116  | 93.4     | 57.7 | 112  | 92.2     | 57.2 | 111  | 86.6     | 54.6 | 105  | 89.6      | 53  | 107 |
| 4  | HYDE PARK | 71.9            | 37.3 | 81.8 | 84       | 43   | 94   | 76.5           | 48   | 80   | 78       | 55.3 | 80.5 | 77.8     | 28.2 | 96.3 | 81.1     | 54.4 | 88.9 | 78.1     | 27.5 | 98.3 | 75.3      | 36  | 88  |
| 5  | HYDE PARK | 95.7            | 75.9 | 101  | 101      | 81.3 | 103  | 98             | 86.8 | 96.4 | 99.3     | 80.2 | 102  | 97.8     | 83.6 | 97.9 | 97.8     | 83.6 | 97.9 | 103      | 85.1 | 107  | 98.9      | 82  | 102 |
| 6  | HYDE PARK | 106             | 76.6 | 114  |          |      |      |                |      |      | 91.1     | 60.1 | 98.2 | 103      | 81.6 | 107  | 102      | 80   | 106  | 104      | 77.6 | 111  | 102       | 76  | 108 |
| 7  | HYDE PARK | 89.4            | 54.8 | 104  | 91.8     | 73   | 96   | 87.7           | 51   | 101  | 89.6     | 66.1 | 95.5 | 92.2     | 78.6 | 96.8 | 93.9     | 77.7 | 98.9 | 90.2     | 50.9 | 108  | 93        |     |     |
| 8  | HYDE PARK | 86.3            | 39.7 | 108  | 89.5     | 16   | 133  | 87.2           | 42.8 | 103  | 79.3     | 39.5 | 94.9 | 80.9     | 48.1 | 89.5 | 78.3     | 44.8 | 88.2 | 77.2     | 35.1 | 98.2 | 74.3      | 36  | 94  |
| 9  | HYDE PARK | 98.8            | 63.5 | 118  | 105      | 73   | 114  | 107            | 74   | 113  | 111      | 83.4 | 119  | 104      | 83.8 | 110  | 105      | 81.9 | 113  | 108      | 70.8 | 125  | 94        | 54  | 112 |
| 10 | HYDE PARK | 104             | 87   | 110  | 106      | 83.6 | 112  | 105            | 82.5 | 112  | 104      | 79.4 | 111  | 110      | 99.4 | 112  | 109      | 96.4 | 112  | 106      | 91.5 | 110  | 107       | 84  | 115 |
| 11 | HYDE PARK | 71.9            | 45.4 | 84.5 | 72.1     | 41   | 87   | 76.1           | 47   | 88   | 74.6     | 43.1 | 88.9 | 78.6     | 46.4 | 94.4 | 75.5     | 45.7 | 90   | 78.1     | 50.5 | 89.1 | 77.9      | 48  | 93  |
| 12 | HYDE PARK | 99.6            | 76.5 | 105  | 104      | 71   | 114  | 108            | 76   | 117  | 106      | 66.3 | 118  | 105      | 84.6 | 110  | 103      | 77.2 | 111  | 103      | 75.5 | 112  | 94.4      | 66  | 105 |
| 13 | HYDE PARK | 105             | 72.4 | 115  | 107      | 70   | 117  | 107            | 72   | 116  | 108      | 67.7 | 121  | 105      | 77.2 | 113  | 103      | 77.1 | 109  | 104      | 71.5 | 114  | 96.8      | 66  | 108 |
| 14 | HYDE PARK | 91.9            | 68.8 | 95.9 | 89       | 64   | 93.9 | 83.7           | 51.4 | 99.6 | 86.2     | 62.1 | 93.3 | 83.7     | 58.2 | 96.3 | 80.1     | 52.8 | 97.9 | 80.8     | 56.8 | 89.7 | 79.8      | 46  | 110 |
| 15 | HYDE PARK | 92.9            | 61   | 104  | 92       | 62   | 98.6 | 97.3           | 60.2 | 109  | 94.4     | 62.4 | 103  | 91.6     | 63.7 | 98.2 | 95.8     | 66.7 | 103  | 98.4     | 65.7 | 109  | 96.4      | 64  | 107 |
| 16 | HYDE PARK | 90.3            | 56.4 | 108  | 94.8     | 50   | 115  | 93.8           | 47   | 114  | 92       | 51.3 | 113  | 88.8     | 49.9 | 107  | 84.7     | 56.5 | 97   | 83.7     | 57.8 | 94.7 | 76.8      | 47  | 91  |
| 17 | HYDE PARK | 99.8            | 75.3 | 109  | 103      | 92   | 103  | 106            | 79   | 108  | 102      | 74.1 | 110  | 99       | 89.3 | 97.5 | 112      | 94.8 | 116  | 102      | 109  | 100  | 95.7      | 97  | 91  |
| 18 | HYDE PARK | 94.7            | 63.2 | 111  | 98       | 62   | 115  | 96.5           | 56   | 118  | 90.6     | 60.4 | 106  | 96.3     | 63.6 | 113  | 101      | 63.9 | 119  | 96.2     | 58.9 | 117  | 97.7      | 66  | 115 |
| 19 | HYDE PARK | 99.2            | 90.2 | 99.3 | 101      | 81   | 101  |                |      |      | 95.1     | 75.1 | 95.5 | 96.5     | 85.8 | 94.2 | 102      | 91.4 | 99.6 | 106      | 81.2 | 108  | 106       | 91  | 107 |
| 20 | HYDE PARK | 101             | 64.8 | 109  | 98       | 53   | 114  | 102            | 60   | 112  | 92       | 26.7 | 130  | 97.4     | 61.4 | 107  | 99.7     | 64   | 109  | 103      | 65.8 | 112  | 96.6      | 61  | 106 |
| 21 | HYDE PARK | 92.7            | 71.9 | 103  | 99.7     | 79   | 108  | 97.8           | 66   | 109  | 101      | 84.4 | 109  | 92.2     | 79   | 99.7 | 93.3     | 84.4 | 99.2 | 97.3     | 85.7 | 104  | 89.8      | 75  | 98  |
| 22 | HYDE PARK | 86              | 53.7 | 100  | 92.4     | 58   | 104  | 86             | 52   | 100  | 83.9     | 48.8 | 98.4 | 89.2     | 63.8 | 97.8 | 88.1     | 57.3 | 101  | 87.1     | 53.3 | 103  | 90.8      | 61  | 102 |
| 23 | HYDE PARK | 77.3            | 59.6 | 88.4 | 78.9     | 56.1 | 91.1 | 74.2           | 50.4 | 88.4 | 78.1     | 57.7 | 89.4 | 79.9     | 66   | 87.1 | 78.9     | 67.5 | 86   | 80.1     | 69.4 | 86.9 | 72.9      | 75  | 89  |
| 24 | HYDE PARK | 97.5            | 73   | 105  | 106      | 104  | 103  | 102            | 85   | 104  | 104      | 93.8 | 103  | 106      | 113  | 101  | 107      | 108  | 103  | 106      | 95.7 | 108  | 100       | 100 | 95  |
| 25 | HYDE PARK | 91.5            | 55.7 | 107  | 95       | 66   | 101  |                |      |      | 92.4     | 66.1 | 98.9 | 89.1     | 66   | 95.3 | 86.9     | 60.4 | 96.1 | 92.3     | 60.1 | 105  | 91.2      | 60  | 103 |
| 26 | HYDE PARK | 99.6            | 55.4 | 120  | 97       | 55   | 113  | 103            | 69   | 111  | 103      | 65.1 | 114  | 110      | 86.6 | 113  | 100      | 65.1 | 112  | 96.8     | 49.3 | 120  | 93.3      | 46  | 118 |
| 27 | HYDE PARK | 87.3            | 54.6 | 105  | 92.4     | 61   | 105  | 91.1           | 63   | 101  | 95       | 60.8 | 110  | 94.3     | 59.1 | 114  | 92.3     | 59.3 | 114  | 93.9     | 55.7 | 119  | 96.9      | 66  | 111 |
| 28 | HYDE PARK | 96.2            | 84.7 | 98.8 |          |      |      | 86.2           | 82   | 86   | 84.2     | 66.6 | 89.9 | 85.9     | 78.1 | 88   | 92.7     | 96   | 90.7 | 95.5     | 95.4 | 94.4 | 92.6      | 97  | 91  |

|    |           |      |      |      |      |      |      |      |      |      |      |      |      |      |      |      |      |      |      |      |      |      |      |      |      |
|----|-----------|------|------|------|------|------|------|------|------|------|------|------|------|------|------|------|------|------|------|------|------|------|------|------|------|
| 29 | HYDE PARK | 82.8 | 55.3 | 89.6 | 78   | 37   | 96   | 72.5 | 31   | 93   | 66.8 | 30.1 | 85.2 | 72.5 | 37.5 | 88.2 | 72.3 | 36.9 | 90.3 | 71.1 | 33.8 | 92   | 79.8 | 44   | 94   |
| 30 | HYDE PARK | 96.4 | 67.1 | 100  | 104  | 68   | 110  | 98.7 | 67   | 102  | 95.7 | 65.9 | 97.1 | 97.8 | 72.8 | 97.6 | 100  | 74.3 | 101  | 97.1 | 68.4 | 99.3 | 98.6 | 68   | 103  |
| 31 | HYDE PARK | 93.3 | 57.7 | 106  | 96.9 | 54   | 110  | 91.6 | 46   | 111  | 90.1 | 43.6 | 109  | 99.8 | 64.6 | 112  | 95.1 | 58.1 | 109  | 97.1 | 61.9 | 110  | 96.7 | 60   | 112  |
| 32 | HYDE PARK | 97.9 | 83.3 | 102  | 98.6 | 85   | 101  |      |      |      | 96.7 | 82.8 | 99.2 | 99.1 | 86.3 | 103  | 99.3 | 85.2 | 104  | 97.3 | 80.3 | 104  | 93.1 | 73   | 101  |
| 33 | HYDE PARK | 75.9 | 44.7 | 89   | 85.6 | 62   | 90   | 81.8 | 62   | 84   | 84.9 | 64.8 | 87.5 | 87   | 66.2 | 91.8 | 80.9 | 57.2 | 88.6 | 74.7 | 43.3 | 87.9 | 72.7 | 39   | 90   |
| 34 | HYDE PARK | 73.5 | 54.9 | 79.4 | 78.3 | 64   | 76.6 | 75.4 | 60   | 77.4 | 76.5 | 58.6 | 79.4 | 74.3 | 62.8 | 75.9 | 74.1 | 58.4 | 78.5 | 77.1 | 61.8 | 81.4 | 70.8 | 52   | 78   |
| 35 | HYDE PARK | 85.6 | 70.6 | 88.9 | 93.5 | 78   | 95   | 93.6 | 76   | 96   | 92.4 | 75.6 | 94.3 | 91.2 | 84.8 | 90.5 | 91.1 | 82.3 | 91.4 | 96.1 | 81.2 | 97.6 | 91.8 | 68   | 100  |
| 36 | HYDE PARK | 78.1 | 51.8 | 88.1 | 90.6 | 76   | 87   | 88.9 | 70   | 87   | 89.3 | 59.8 | 97.2 | 89.4 | 72.1 | 88.3 | 90.1 | 71.9 | 89.9 | 91.8 | 74.8 | 89.2 | 87.5 | 67   | 89   |
| 37 | HYDE PARK | 85   | 60.4 | 94.7 | 88.4 | 63.8 | 95.3 | 81.6 | 57   | 89.3 | 85.1 | 60.7 | 91.8 | 80   | 57   | 88.4 | 80.8 | 60.7 | 86.9 | 88.8 | 67   | 95   | 85   | 60   | 95   |
| 38 | HYDE PARK | 83.8 | 80.3 | 77.8 | 86.1 | 82   | 80   | 78.5 | 74   | 72   | 86.8 | 90.1 | 77.1 | 79.4 | 79.4 | 73.1 | 85.6 | 91.2 | 76   | 89.6 | 95.5 | 79.3 | 87.8 | 94   | 79   |
| 39 | HYDE PARK | 86.7 | 54.4 | 106  | 99.5 | 66.7 | 113  | 99.3 | 68.1 | 111  | 105  | 78.4 | 112  | 102  | 76.7 | 110  | 104  | 81.5 | 110  | 99.6 | 71.3 | 111  | 102  | 82   | 104  |
| 40 | HYDE PARK | 89.8 | 58.2 | 105  | 96.4 | 68   | 104  | 88.6 | 61   | 97   | 89.1 | 61.9 | 96.5 | 93.8 | 68.3 | 101  | 92.9 | 67.9 | 100  | 92.9 | 63.4 | 105  | 88.2 | 58   | 103  |
| 41 | HYDE PARK | 109  | 108  | 105  | 112  | 97.9 | 111  | 99.3 | 73.2 | 105  | 101  | 74.3 | 108  | 102  | 85.1 | 103  | 113  | 118  | 107  | 107  | 90.2 | 110  | 108  | 98   | 106  |
| 42 | HYDE PARK | 73.5 | 39.8 | 103  | 83.3 | 51   | 105  | 82.1 | 49   | 105  | 82.8 | 49.3 | 105  | 79.5 | 46.2 | 105  | 79.1 | 46.4 | 103  | 73.6 | 41.5 | 103  | 75.3 | 41   | 106  |
| 43 | HYDE PARK | 79.2 | 54   | 91.6 | 87.1 | 65.6 | 94   | 82.2 | 57.1 | 92.1 | 84.2 | 57.4 | 95.2 | 87.3 | 68   | 95.1 | 85.6 | 69.3 | 90.8 | 87.1 | 70   | 93.1 | 90.5 | 70   | 99   |
| 44 | HYDE PARK | 53   | 19.7 | 99.6 | 58.3 | 19   | 107  | 52.5 | 20   | 99   | 56.5 | 20.8 | 102  | 63.6 | 27.2 | 101  | 58.3 | 22.9 | 93.3 | 61.9 | 25.4 | 107  | 72.8 | 32   | 113  |
| 45 | HYDE PARK | 88.1 | 50.9 | 108  | 96.5 | 47   | 124  | 90.3 | 43   | 121  | 91.5 | 53.6 | 110  | 96.3 | 58.2 | 116  | 91   | 58   | 106  | 92.1 | 53   | 115  | 81.5 | 46   | 103  |
| 46 | HYDE PARK | 63.8 | 36.4 | 80.6 | 68.8 | 41   | 82   | 66.7 | 40   | 81   | 70.2 | 48.6 | 78.5 | 73.1 | 47.8 | 83.9 | 74.2 | 47.6 | 86.4 | 70.6 | 45.3 | 82.7 | 69.3 | 45   | 81   |
| 47 | HYDE PARK | 98.9 | 70.1 | 110  | 102  | 77   | 108  | 98.6 | 66   | 109  | 99.5 | 70.7 | 108  | 105  | 84.4 | 112  | 102  | 79.6 | 108  | 96.5 | 69.1 | 106  | 99.7 | 78   | 107  |
| 48 | HYDE PARK | 78.3 | 43.9 | 103  | 69.6 | 32   | 97   | 67.5 | 34   | 94   | 70.5 | 31.5 | 100  | 78.8 | 44.1 | 102  | 65.2 | 39.2 | 85.1 | 83.1 | 51.6 | 102  | 98.9 | 76   | 111  |
| 49 | HYDE PARK | 93.6 | 78.8 | 96   | 93.2 | 68   | 99   | 88.7 | 60   | 97   | 95.1 | 72.4 | 98.7 | 91.1 | 68.4 | 97.2 | 91.9 | 76.5 | 95.2 | 94.7 | 73.3 | 99.6 | 92.1 | 67   | 100  |
| 50 | HYDE PARK | 95.5 | 78   | 95.7 | 99.7 | 80   | 101  | 100  | 82   | 99   | 106  | 90.9 | 103  | 100  | 86.8 | 97   | 96.6 | 79   | 99.4 | 102  | 83.5 | 104  | 87.1 | 73   | 87   |
| 51 | HYDE PARK | 96.4 | 69.1 | 108  | 88.8 | 60   | 99   | 91.3 | 60   | 104  | 92   | 61.5 | 110  | 97.1 | 65.9 | 112  | 94.2 | 63.8 | 108  | 94.4 | 64.3 | 109  | 98.4 | 65   | 114  |
| 52 | HYDE PARK | 95   | 77.6 | 101  | 96   | 73   | 103  | 103  | 81   | 109  | 102  | 83.3 | 106  | 99.7 | 85.1 | 103  | 101  | 83.9 | 106  | 100  | 86.7 | 103  | 90.2 | 76   | 94   |
| 53 | HYDE PARK | 85.5 | 89.9 | 77.1 | 82.1 | 76   | 80   | 88.4 | 87   | 82   | 82.6 | 83.6 | 75.8 | 81.9 | 83.4 | 77.2 | 92.6 | 100  | 83.5 | 86   | 83   | 77.8 | 79.9 | 85   | 74   |
| 54 | HYDE PARK | 68.7 | 34   | 98.8 | 76   | 35   | 112  | 73.6 | 39   | 101  | 75.7 | 37.8 | 105  | 79.3 | 39.3 | 111  | 75.5 | 37.8 | 106  | 79.9 | 38.5 | 116  | 72.1 | 34   | 107  |
| 55 | HYDE PARK | 88.2 | 54.9 | 108  | 103  | 75   | 112  | 100  | 66   | 114  | 95.2 | 62.7 | 110  | 94.1 | 63   | 110  | 94.9 | 60.4 | 114  | 93.3 | 60.7 | 111  | 96.2 | 62   | 114  |
| 56 | HYDE PARK | 110  | 96.9 | 116  | 111  | 89   | 121  | 105  | 81   | 115  | 107  | 79.2 | 120  | 109  | 92   | 116  | 111  | 98.9 | 117  | 115  | 104  | 120  | 116  | 101  | 122  |
| 57 | HYDE PARK | 91.9 | 92.6 | 90.9 | 89.5 | 78   | 91   | 83.9 | 65   | 89   | 89.9 | 67   | 94.8 | 90   | 81.7 | 91.4 | 87.3 | 79   | 87   | 84.1 | 71.6 | 87.1 | 91.7 | 106  | 85   |
| 58 | HYDE PARK | 88.2 | 53.7 | 103  | 91.4 | 59   | 100  | 90.4 | 59   | 100  | 90   | 55.9 | 102  | 92.8 | 66.7 | 100  | 93.3 | 60.6 | 106  | 91.7 | 60.8 | 102  | 91.3 | 57   | 105  |
| 59 | HYDE PARK | 77.7 | 53.8 | 88.2 | 80.3 | 46   | 92   | 80.5 | 54   | 91   | 82.3 | 57.4 | 90.4 | 80.4 | 56.5 | 90.8 | 78.6 | 55.5 | 88.8 | 77.9 | 51.8 | 90.6 | 72.8 | 40   | 89   |
| 60 | HYDE PARK | 106  | 76.4 | 113  | 109  | 67   | 124  | 110  | 69   | 125  | 107  | 68.1 | 118  | 105  | 68.7 | 117  | 110  | 76.1 | 120  | 107  | 69.2 | 120  | 111  | 76   | 121  |
| 1  | OXFORD ST | 85.4 | 68   | 89.4 | 91.6 | 70.8 | 95.9 | 91   | 72.7 | 92.6 | 89.5 | 72.4 | 91   | 88.6 | 75.5 | 90.2 | 83.8 | 68.8 | 87.5 | 84.7 | 70.6 | 87.8 | 82.9 | 59.3 | 90.7 |
| 2  | OXFORD ST | 63.6 | 35.6 | 73.1 | 69.2 | 43.2 | 74.4 | 64.5 | 38   | 71.3 | 60.2 | 34   | 67.9 | 68.9 | 54.4 | 68.2 | 69.2 | 49.5 | 71.6 | 71.9 | 47.2 | 78.2 | 63.8 | 47.8 | 65   |
| 3  | OXFORD ST | 90.3 | 54.5 | 108  | 93.5 | 60.2 | 108  | 96.8 | 64.9 | 109  | 94   | 60.4 | 108  | 97.2 | 65.5 | 111  | 94.4 | 64.8 | 108  | 94.9 | 66.4 | 107  | 91.9 | 64.7 | 103  |
| 4  | OXFORD ST | 69.1 | 41.6 | 75   | 76.2 | 50.8 | 78.8 | 73   | 29.2 | 88.6 | 69.4 | 49.6 | 71.6 | 71.4 | 48.3 | 75.2 | 72.7 | 44.6 | 79   | 70.8 | 31.9 | 83.4 | 75.2 | 37.8 | 86.3 |

|    |           |      |      |      |      |      |      |      |      |      |      |      |      |      |      |      |      |      |      |      |      |      |      |      |      |
|----|-----------|------|------|------|------|------|------|------|------|------|------|------|------|------|------|------|------|------|------|------|------|------|------|------|------|
| 5  | OXFORD ST | 93.5 | 72.4 | 99.2 | 89.5 | 76   | 90   | 87.4 | 77   | 86   | 86.9 | 71.9 | 88.3 | 89.4 | 66.9 | 96.4 | 94.8 | 77.9 | 98.3 | 97.3 | 71.6 | 106  | 99.1 | 77.2 | 105  |
| 6  | OXFORD ST | 99.7 | 61.1 | 112  | 105  | 59.6 | 118  | 104  | 73.3 | 109  | 100  | 65.8 | 107  | 96.6 | 80.8 | 98.3 | 97.5 | 78.1 | 99.1 | 97.7 | 80.8 | 98.2 | 103  | 73.5 | 110  |
| 7  | OXFORD ST | 101  | 87.8 | 107  | 105  | 83.9 | 112  | 101  | 77.4 | 108  | 101  | 72   | 110  | 100  | 104  | 99.4 | 98.5 | 89.4 | 101  | 103  | 82   | 111  | 103  | 89.3 | 108  |
| 8  | OXFORD ST | 82   | 41.1 | 97.7 | 82.2 | 43   | 94   | 84.8 | 38   | 103  | 77.1 | 31.3 | 95.2 | 76.9 | 43.2 | 87.3 | 74.4 | 39.4 | 86.6 | 74   | 33.9 | 92.3 | 81.7 | 43.1 | 94.3 |
| 9  | OXFORD ST | 94.8 | 62.1 | 110  | 102  | 66.7 | 119  | 100  | 67   | 114  | 99.1 | 60   | 119  | 98.3 | 70.3 | 111  | 101  | 77.1 | 109  | 99.4 | 77.7 | 107  | 96.6 | 63.3 | 114  |
| 10 | OXFORD ST | 106  | 67.5 | 124  | 117  | 95   | 123  | 105  | 83   | 111  | 99.4 | 75.5 | 107  | 107  | 97.4 | 108  | 108  | 97.3 | 109  | 109  | 93.7 | 115  | 114  | 99.5 | 117  |
| 11 | OXFORD ST | 74.2 | 45.3 | 87.6 | 79.3 | 50.7 | 91.1 | 85.2 | 52.8 | 97.1 | 75.4 | 46.7 | 85.2 | 75.1 | 49   | 86.2 | 71.5 | 40.5 | 89.1 | 77.3 | 49   | 89.4 | 76.3 | 41.9 | 95.2 |
| 12 | OXFORD ST | 98.5 | 72.6 | 107  | 102  | 71.4 | 110  | 99.4 | 65   | 110  | 95.5 | 63.6 | 107  | 96.5 | 82.6 | 97.8 | 92.7 | 70.5 | 98.7 | 92.3 | 66.5 | 101  | 95.3 | 66.7 | 105  |
| 13 | OXFORD ST | 99.8 | 66.3 | 112  | 105  | 69   | 116  | 102  | 66   | 113  | 100  | 65.6 | 111  | 102  | 77.5 | 108  | 99.3 | 68.4 | 110  | 103  | 75.6 | 110  | 95   | 64.4 | 106  |
| 14 | OXFORD ST | 71.2 | 40.1 | 96   | 86.5 | 47   | 114  | 86.3 | 36   | 118  | 84.9 | 49.2 | 105  | 74.4 | 50.5 | 87   | 76.2 | 50.4 | 95.5 | 70.1 | 47.9 | 80.7 | 74.8 | 53.6 | 82.1 |
| 15 | OXFORD ST | 92.6 | 62.8 | 102  | 91.6 | 63   | 98   | 93.7 | 63   | 101  | 88.4 | 57   | 96.9 | 94.9 | 65.2 | 103  | 94.8 | 66.9 | 102  | 97.7 | 67.4 | 107  | 92.5 | 59   | 104  |
| 16 | OXFORD ST | 91.6 | 63.8 | 102  | 92.6 | 48.8 | 110  | 87   | 37.5 | 103  | 86.5 | 44.2 | 100  | 83.5 | 46.1 | 99.2 | 86   | 56.5 | 97.1 | 79.7 | 49.6 | 92.4 | 81.8 | 59.7 | 89.1 |
| 17 | OXFORD ST | 95.5 | 134  | 85.4 | 103  | 91   | 103  | 97.4 | 99.4 | 90.3 | 102  |      |      | 101  | 117  | 95.5 | 95.4 | 103  | 92   | 103  | 110  | 98.6 | 94.6 | 96   | 92.5 |
| 18 | OXFORD ST | 95.9 | 64.7 | 112  | 109  | 71.5 | 125  | 101  | 63.5 | 120  | 103  | 65.5 | 120  | 100  | 71.2 | 114  | 99.9 | 63.5 | 119  | 110  | 79.6 | 125  | 104  | 73.1 | 119  |
| 19 | OXFORD ST | 99.5 | 81.1 | 101  | 107  | 80.2 | 108  | 107  | 90.1 | 105  | 104  | 88.7 | 101  | 99.6 | 98.7 | 92.9 | 97.1 | 89.2 | 92.4 | 104  | 87.1 | 103  | 99.2 | 89.2 | 94.9 |
| 20 | OXFORD ST | 94.4 | 58.2 | 105  | 105  | 61.9 | 116  | 93.4 | 58   | 99.2 | 85.4 | 53.2 | 91.8 | 88.2 | 50.5 | 101  | 105  | 63.8 | 117  | 99.9 | 63.7 | 107  | 105  | 64.2 | 117  |
| 21 | OXFORD ST | 91.5 | 76.8 | 99.6 | 97.8 | 77.3 | 107  | 95.7 | 81.5 | 102  | 102  | 92.5 | 107  | 92.7 | 80.5 | 100  | 95.9 | 85.2 | 103  | 93.6 | 83.7 | 100  | 91.3 | 73.8 | 101  |
| 22 | OXFORD ST | 95.2 | 60.2 | 109  | 97.2 | 67   | 106  | 96.5 | 67.4 | 104  | 87.4 | 60.6 | 94.9 | 90.7 | 65.4 | 99.2 | 90.5 | 60.8 | 101  | 82.1 | 57.5 | 91.1 | 90.1 | 60.4 | 101  |
| 23 | OXFORD ST | 81   | 65   | 91.5 | 81.2 | 63   | 89   | 75.2 | 53   | 89   | 78   | 61.8 | 85.7 | 73.1 | 63.6 | 78.6 | 79.7 | 70.8 | 86.6 | 78.8 | 52.9 | 95.3 | 85.1 | 68.9 | 96.4 |
| 24 | OXFORD ST | 104  | 88.6 | 107  | 105  | 93.2 | 104  | 105  | 99   | 103  | 105  | 101  | 102  | 109  | 112  | 102  | 105  | 102  | 97.8 | 109  | 98   | 110  | 107  | 102  | 106  |
| 25 | OXFORD ST | 95.9 | 64.9 | 107  | 98.7 | 46.3 | 125  | 100  | 37.8 | 133  | 95.2 | 65.1 | 104  | 97.6 | 79.5 | 99.2 | 91.8 | 71.4 | 95.4 | 92.2 | 57.1 | 107  | 99.5 | 72.5 | 107  |
| 26 | OXFORD ST | 92.7 | 52   | 114  | 94.6 | 50.6 | 115  | 99.4 | 52.3 | 121  | 98.3 | 57.6 | 115  | 94.8 | 62.2 | 107  | 92.7 | 55.7 | 111  | 99.1 | 68.7 | 108  | 98.9 | 59.9 | 116  |
| 27 | OXFORD ST | 92.8 | 58.9 | 111  | 104  | 64.1 | 124  | 94   | 57.7 | 114  | 90.2 | 55.9 | 109  | 85.6 | 49.4 | 112  | 88.1 | 65.5 | 94.4 | 97.4 | 65   | 112  | 88.8 | 55.1 | 107  |
| 28 | OXFORD ST | 96.8 | 89.8 | 96.6 | 102  | 99.9 | 97.6 | 97.4 | 94   | 94.2 | 89.4 | 78.6 | 89.2 | 84.2 | 73.1 | 84.9 | 97.9 | 101  | 91.8 | 98.5 | 91.5 | 98.2 | 99   | 85.2 | 101  |
| 29 | OXFORD ST | 94.2 | 61.1 | 105  | 92.7 | 52   | 106  | 93.9 | 46.1 | 116  | 87.1 | 34.3 | 113  | 88.3 | 53.6 | 99.5 | 90.3 | 52.3 | 104  | 87.9 | 49.3 | 104  | 98.1 | 69.1 | 105  |
| 30 | OXFORD ST | 97   | 72.8 | 99.1 | 99.4 | 76.2 | 98.9 | 90.6 | 65.7 | 93.5 | 91.6 | 61   | 96.9 | 92.4 | 67.1 | 94.9 | 89.7 | 63.7 | 93.4 | 90.2 | 64.5 | 91.9 | 99   | 66.7 | 105  |
| 31 | OXFORD ST | 83.4 | 44.7 | 102  | 93.4 | 52   | 109  | 81.6 | 41.9 | 99   | 83.3 | 46   | 96.8 | 90   | 60.1 | 100  | 81   | 51.1 | 92.4 | 80   | 51.1 | 91.3 | 82.4 | 50.8 | 95.4 |
| 32 | OXFORD ST | 101  | 87.6 | 106  | 99.8 | 85.3 | 102  | 95.1 | 74.7 | 100  | 96.6 | 81.9 | 98.5 | 99.3 | 83.2 | 105  | 99.4 | 92.8 | 99.5 | 104  | 97.8 | 104  | 96.1 | 85.7 | 98.3 |
| 33 | OXFORD ST | 73.3 | 43.5 | 86.3 | 84.6 | 55.8 | 90.1 | 74.6 | 36.4 | 87   | 73.6 | 43.5 | 85.2 | 78   | 49.5 | 88.5 | 70.1 | 39.4 | 85.5 | 76.5 | 38.7 | 95.1 | 84   | 53.9 | 95.1 |
| 34 | OXFORD ST | 73.2 | 58.2 | 77.3 | 74.9 | 64   | 74   | 69.6 | 59   | 70   | 73.2 | 60.4 | 74.2 | 74.1 | 63.2 | 75.9 | 73.2 | 61.3 | 75   | 70.5 | 51.4 | 77.5 | 69.3 | 47.7 | 78.5 |
| 35 | OXFORD ST | 90.1 | 69.5 | 95.5 | 91.9 | 73.7 | 93   | 84.8 | 63.8 | 88.4 | 88.8 | 71.2 | 91   | 93.5 | 81.3 | 94.7 | 92.7 | 78   | 93.7 | 91.3 | 68.6 | 98.4 | 85.8 | 66.2 | 90.9 |
| 36 | OXFORD ST | 81.6 | 59.4 | 86.6 | 97.6 | 76   | 95.7 | 93   | 67.2 | 96.3 | 94.2 | 77.2 | 89.5 | 89.9 | 75.4 | 86.3 | 88.8 | 77.4 | 82.5 | 87.9 | 63.4 | 93.7 | 78.2 | 59.7 | 79.6 |
| 37 | OXFORD ST | 82.7 | 58   | 91.7 | 80.9 | 56   | 89   | 78.1 | 55   | 84   | 78.7 | 55.6 | 86.1 | 77.4 | 56.7 | 83.6 | 77.2 | 76.5 | 80.3 | 80.9 | 59.4 | 87.9 | 85.9 | 62.9 | 93.5 |
| 38 | OXFORD ST | 85.4 | 90.2 | 78.9 | 91.5 | 99   | 80.6 | 85.1 | 89.3 | 76.2 | 89.7 | 94.5 | 79   | 87.6 | 101  | 76.6 | 84.6 | 95.9 | 73.4 | 88.2 | 98.5 | 78.5 | 85.7 | 100  | 74.9 |
| 39 | OXFORD ST | 92.6 | 66.3 | 104  | 105  | 81   | 110  | 102  | 78   | 108  | 104  | 77.1 | 110  | 104  | 84   | 107  | 104  | 81.7 | 110  | 104  | 80.5 | 110  | 97   | 67.9 | 110  |
| 40 | OXFORD ST | 91   | 57   | 109  | 95.4 | 65.9 | 105  | 97.1 | 65.8 | 108  | 92.1 | 63.8 | 101  | 90.5 | 64.7 | 98.3 | 90.6 | 63.4 | 101  | 91.8 | 60   | 107  | 83.6 | 53.5 | 98.6 |

|    |           |      |      |      |      |      |      |      |      |      |      |      |      |      |      |      |      |      |      |      |      |      |      |      |      |
|----|-----------|------|------|------|------|------|------|------|------|------|------|------|------|------|------|------|------|------|------|------|------|------|------|------|------|
| 41 | OXFORD ST | 114  | 107  | 111  | 116  | 104  | 113  | 107  | 91   | 108  | 105  | 81.5 | 109  | 101  | 82.4 | 104  | 101  | 80.1 | 105  | 97.3 | 69.6 | 107  | 107  | 92.6 | 109  |
| 42 | OXFORD ST | 67.5 | 34   | 102  | 73.5 | 38   | 107  | 71.7 | 37.4 | 105  | 76.8 | 42.7 | 108  | 70.1 | 39.7 | 97   | 73   | 41.1 | 103  | 75.1 | 40.6 | 107  | 72.1 | 39.5 | 104  |
| 43 | OXFORD ST | 82.2 | 54.3 | 96.1 | 90   | 67   | 98   | 81.7 | 53   | 95   | 77.1 | 47.8 | 91.3 | 86.5 | 77.7 | 89.4 | 83.8 | 68.4 | 87.4 | 85.3 | 56.7 | 99.4 | 85.7 | 63.2 | 94.6 |
| 44 | OXFORD ST | 84.6 | 44.3 | 111  | 88.2 | 45.3 | 109  | 81.2 | 40.5 | 106  | 81.5 | 42.2 | 105  | 89   | 46.9 | 116  | 82.4 | 34.4 | 119  | 85.6 | 43.5 | 116  | 59   | 22.2 | 103  |
| 45 | OXFORD ST | 76.2 | 42.5 | 105  | 86.6 | 42.7 | 112  | 84.7 | 45   | 107  | 81.3 | 44.7 | 104  | 79.4 | 48.9 | 95   | 75.3 | 41   | 104  | 76.1 | 40.3 | 99.2 | 73   | 38.7 | 97.5 |
| 46 | OXFORD ST | 71.2 | 46.6 | 81.7 | 71.2 | 42.1 | 84.2 | 70.4 | 43.7 | 82.3 | 69.4 | 41.3 | 82.6 | 67.6 | 40.3 | 81.9 | 68.7 | 40.7 | 83.6 | 61.2 | 33   | 82   | 75   | 50.1 | 85.1 |
| 47 | OXFORD ST | 94.2 | 72.5 | 101  | 94.1 | 68.8 | 99.8 | 97.7 | 74.2 | 104  | 89.9 | 65.7 | 96.1 | 95.5 | 75.8 | 101  | 100  | 78.8 | 106  | 93.2 | 64.1 | 104  | 91.5 | 62.2 | 104  |
| 48 | OXFORD ST | 76.2 | 42   | 99   | 85.2 | 46.1 | 108  | 72.1 | 34   | 101  | 64.3 | 30.5 | 92.9 | 77.4 | 46.1 | 97.1 | 77.3 | 51.5 | 90.4 | 70   | 40.2 | 90.1 | 79.8 | 47.8 | 99.6 |
| 49 | OXFORD ST | 93   | 74.4 | 96.6 | 98.6 | 63.9 | 109  | 90.3 | 59.9 | 97.4 | 87.3 | 62.5 | 93.2 | 87.1 | 69.7 | 92.1 | 97.8 | 75.6 | 104  | 93.6 | 79.1 | 95.7 | 87   | 71   | 90   |
| 50 | OXFORD ST | 98.4 | 83.7 | 96.9 | 103  | 82.7 | 103  | 97.6 | 84.1 | 94.3 | 98.2 | 84   | 94.2 | 97.7 | 84.9 | 94.1 | 101  | 88   | 97.9 | 100  | 87   | 97.5 | 99.8 | 84.2 | 98.1 |
| 51 | OXFORD ST | 99.9 | 71   | 111  | 95.3 | 59.2 | 111  | 90   | 55.7 | 106  | 93.5 | 63.4 | 104  | 101  | 70.6 | 113  | 98.6 | 67.7 | 111  | 103  | 74.8 | 113  | 92.3 | 68.8 | 101  |
| 52 | OXFORD ST | 92.8 | 69.9 | 102  | 95.1 | 73.3 | 102  | 94.5 | 74.3 | 99.7 | 93   | 74.5 | 97.6 | 98.3 | 81.4 | 104  | 97.5 | 82.8 | 102  | 95.2 | 82.6 | 98.2 | 91.2 | 73.9 | 96.4 |
| 53 | OXFORD ST | 81.6 | 77.7 | 79.3 | 89.8 | 93.7 | 85.4 | 88.4 | 86.6 | 82.5 | 76.7 | 77.7 | 70   | 86.8 | 88.9 | 82.1 | 85.7 | 85.3 | 81.1 | 82.3 | 82.1 | 77.5 | 79.5 | 86   | 73.4 |
| 54 | OXFORD ST | 78.7 | 41.5 | 108  | 84   | 45.5 | 109  | 77.9 | 40.2 | 107  | 76   | 37.6 | 107  | 81.9 | 44   | 109  | 82.4 | 45.4 | 111  | 83.8 | 44.4 | 115  | 75.3 | 36.3 | 111  |
| 55 | OXFORD ST | 90.5 | 59.9 | 108  | 95.6 | 64.5 | 108  | 94.1 | 64.1 | 107  | 96.2 | 63.5 | 110  | 94.8 | 65.6 | 108  | 92.4 | 61.6 | 108  | 98.9 | 72.3 | 109  | 94.9 | 59.6 | 116  |
| 56 | OXFORD ST | 101  | 80.8 | 109  | 98.3 | 67.8 | 112  | 79.4 | 46.5 | 101  | 81.9 | 49   | 105  | 108  | 94.1 | 113  | 105  | 83.3 | 114  | 101  | 72.7 | 115  | 110  | 86.1 | 121  |
| 57 | OXFORD ST | 77.9 | 33.6 | 102  | 92.1 | 69.4 | 97.2 | 82.8 | 54.9 | 91.8 | 80.4 | 54.4 | 88.4 | 84.1 | 73.8 | 86   | 91.4 | 65.7 | 100  | 86.7 | 64.9 | 93.7 | 82.7 | 57.7 | 91.6 |
| 58 | OXFORD ST | 79.3 | 46.6 | 94.4 | 87.1 | 50.1 | 102  | 81.1 | 45.1 | 96.7 | 83.4 | 48.6 | 97.1 | 85.3 | 58.2 | 94   | 84.4 | 52.6 | 97.6 | 79.9 | 47.5 | 94.6 | 79.4 | 48.7 | 92.5 |
| 59 | OXFORD ST | 77.6 | 52.5 | 88.3 | 71.8 | 36.3 | 93.1 | 60.9 | 26.4 | 93.9 | 62.5 | 30.3 | 86.3 | 71   | 38.9 | 87.7 | 69.6 | 39   | 88.2 | 72.5 | 43.5 | 87.2 | 70.7 | 39.6 | 90.5 |
| 60 | OXFORD ST | 112  | 75.6 | 124  | 115  | 72.9 | 128  | 109  | 67   | 124  | 108  | 69.7 | 120  | 112  | 82.4 | 119  | 108  | 77.4 | 115  | 106  | 79.2 | 111  | 102  | 72.8 | 110  |



|    |           |    |    |    |   |    |    |   |   |   |   |   |   |    |    |    |    |
|----|-----------|----|----|----|---|----|----|---|---|---|---|---|---|----|----|----|----|
| 56 | HYDE PARK | 4  | 2  | 2  | 1 | 2  | 2  | 3 | 2 | 0 | 4 | 1 | 5 | 3  | 5  | 2  | 3  |
| 57 | HYDE PARK | 0  | 0  | 0  | 2 | 0  | 0  | 2 | 0 | 0 | 0 | 0 | 0 | 1  | 0  | 0  | 0  |
| 58 | HYDE PARK | 0  | 0  | 0  | 0 | 0  | 0  | 0 | 1 | 2 | 0 | 0 | 0 | 0  | 0  | 0  | 0  |
| 59 | HYDE PARK |    |    |    |   |    |    |   | 2 | 0 |   |   |   |    |    |    |    |
| 60 | HYDE PARK | 0  | 0  | 0  | 0 | 0  | 0  | 0 | 4 | 1 | 0 | 0 | 0 | 0  | 0  | 0  | 0  |
| 1  | OXFORD ST |    | 1  | 0  | 0 | 2  | 5  | 4 | 1 | 1 | 3 | 1 | 0 | 2  | 2  | 0  | 2  |
| 2  | OXFORD ST | 0  | 0  | 0  | 0 | 0  | 0  | 1 | 0 | 0 | 1 | 4 | 0 | 0  | 0  | 3  | 1  |
| 3  | OXFORD ST | 3  | 2  | 2  | 3 | 2  | 3  | 3 | 3 | 2 | 5 | 3 | 2 | 2  | 2  | 3  | 2  |
| 4  | OXFORD ST | 0  | 0  | 0  | 0 | 0  | 1  | 0 | 0 | 0 | 0 | 0 | 0 | 0  | 0  | 0  | 0  |
| 5  | OXFORD ST |    |    |    |   |    |    |   | 2 | 0 |   |   |   |    |    |    |    |
| 6  | OXFORD ST | 1  | 0  | 0  | 0 | 1  | 0  | 0 | 1 | 0 | 0 | 0 | 0 | 0  | 0  | 3  | 3  |
| 7  | OXFORD ST | 1  | 1  | 1  | 2 | 2  | 3  | 0 | 2 | 1 | 1 | 2 | 1 | 2  | 1  | 2  | 1  |
| 8  | OXFORD ST | 1  | 0  | 0  | 0 | 1  | 1  | 0 | 2 | 1 | 2 | 0 | 1 | 1  | 1  | 1  | 1  |
| 9  | OXFORD ST | 1  | 0  | 0  | 0 | 0  | 0  | 0 | 0 | 0 | 3 | 6 | 7 | 7  | 8  | 7  | 8  |
| 10 | OXFORD ST | 0  | 0  | 0  | 1 | 0  | 0  | 0 | 0 | 0 | 0 | 0 | 0 | 0  | 0  | 0  | 0  |
| 11 | OXFORD ST | 1  | 2  | 1  | 3 | 2  | 1  | 1 | 1 | 2 | 0 | 4 | 6 | 3  | 5  | 5  | 1  |
| 12 | OXFORD ST | 2  | 2  | 5  | 6 | 10 | 10 | 7 | 4 | 3 | 5 | 2 | 2 | 2  | 2  | 2  | 2  |
| 13 | OXFORD ST | 0  | 0  | 0  | 0 | 0  | 4  | 0 | 1 | 0 | 1 | 1 | 0 | 0  | 0  | 0  | 0  |
| 14 | OXFORD ST | 0  | 0  | 1  | 0 | 0  | 1  | 1 | 0 | 0 | 5 | 1 | 0 | 0  | 2  | 0  | 0  |
| 15 | OXFORD ST | 3  | 0  | 1  | 3 | 3  | 2  | 5 | 2 | 1 | 2 | 2 | 0 | 2  | 3  | 0  | 0  |
| 16 | OXFORD ST | 0  | 1  | 1  | 1 | 1  | 1  | 0 | 2 | 0 | 0 | 0 | 0 | 0  | 0  | 0  | 0  |
| 17 | OXFORD ST | 1  | 1  | 0  | 0 | 1  | 1  | 1 | 2 | 4 | 3 | 3 | 1 | 1  | 3  | 3  | 3  |
| 18 | OXFORD ST | 2  | 2  | 1  | 1 | 0  | 1  | 1 | 2 | 2 | 2 | 1 | 2 | 1  | 1  | 3  | 3  |
| 19 | OXFORD ST | 1  | 0  | 0  | 3 | 3  | 2  | 0 | 1 | 1 | 0 | 1 | 0 | 0  | 2  | 0  | 0  |
| 20 | OXFORD ST | 3  | 4  | 2  | 0 | 3  | 2  | 2 | 3 | 0 | 2 | 2 | 7 | 12 | 14 | 12 | 12 |
| 21 | OXFORD ST |    |    |    |   |    |    |   | 2 | 0 |   |   |   |    |    |    |    |
| 22 | OXFORD ST | 0  | 3  | 8  | 6 | 3  | 0  | 1 | 8 | 5 | 5 | 2 | 2 | 1  | 2  | 1  | 3  |
| 23 | OXFORD ST | 5  | 5  | 6  | 5 | 5  | 6  | 7 | 3 | 1 | 6 | 6 | 1 | 1  | 2  | 0  | 1  |
| 24 | OXFORD ST | 10 | 10 | 11 | 9 | 10 | 6  | 3 | 1 | 3 | 7 | 9 | 9 | 7  | 5  | 4  | 4  |
| 25 | OXFORD ST | 2  | 1  | 1  | 1 | 1  | 1  | 1 | 0 | 2 | 1 | 2 | 1 | 1  | 1  | 2  | 2  |
| 26 | OXFORD ST | 2  | 4  | 3  | 1 | 3  | 4  | 6 | 6 | 3 | 6 | 3 | 1 | 2  | 3  | 2  | 5  |
| 27 | OXFORD ST |    |    |    |   |    |    |   | 1 | 2 |   |   |   |    |    |    |    |
| 28 | OXFORD ST | 0  | 0  | 1  | 1 | 0  | 0  | 0 | 3 | 0 | 4 | 2 | 0 | 0  | 0  | 0  | 0  |
| 29 | OXFORD ST | 0  | 1  | 1  | 1 | 1  | 1  | 2 | 0 | 0 | 0 | 0 | 1 | 1  | 2  | 1  | 1  |
| 30 | OXFORD ST | 6  | 3  | 2  | 2 | 0  | 0  | 0 | 0 | 0 | 1 | 1 | 1 | 1  | 2  | 2  | 2  |
| 31 | OXFORD ST | 2  | 2  | 2  | 2 | 1  | 1  | 2 | 2 | 2 | 2 | 2 | 2 | 1  | 1  | 1  | 1  |
| 32 | OXFORD ST | 3  | 3  | 1  | 0 | 4  | 0  | 4 | 0 | 0 | 3 | 2 | 2 | 0  | 0  | 1  | 3  |
| 33 | OXFORD ST | 0  | 0  | 0  | 2 | 2  | 1  | 1 | 1 | 2 | 1 | 2 | 0 | 1  | 1  | 0  | 2  |
| 34 | OXFORD ST | 0  | 0  | 1  | 0 | 0  | 0  | 0 | 0 | 0 | 0 | 0 | 0 | 0  | 0  | 0  | 0  |
| 35 | OXFORD ST | 9  | 1  | 1  | 1 | 1  | 3  | 1 | 0 | 0 | 6 | 4 | 0 | 1  | 1  | 4  | 3  |
| 36 | OXFORD ST | 0  | 0  | 2  | 5 | 5  | 2  | 1 | 0 | 2 | 2 | 1 | 0 | 1  | 0  | 3  | 4  |
| 37 | OXFORD ST | 0  | 0  | 0  | 0 | 0  | 0  | 0 | 0 | 0 | 0 | 0 | 0 | 0  | 0  | 0  | 0  |
| 38 | OXFORD ST | 0  | 0  | 0  | 0 | 0  | 0  | 0 | 1 | 0 | 0 | 0 | 0 | 0  | 0  | 0  | 0  |
| 39 | OXFORD ST | 1  | 1  | 2  | 2 | 1  | 1  | 0 | 2 | 0 | 0 | 0 | 0 | 0  | 1  | 0  | 0  |
| 40 | OXFORD ST | 1  | 2  | 2  | 2 | 0  | 0  | 0 | 1 | 0 | 3 | 1 | 2 | 0  | 0  | 0  | 0  |
| 41 | OXFORD ST |    |    |    |   |    |    |   | 1 | 0 |   |   |   |    |    |    |    |
| 42 | OXFORD ST | 0  | 0  | 0  | 1 | 1  | 0  | 0 | 1 | 0 | 1 | 4 | 5 | 4  | 3  | 2  | 1  |
| 43 | OXFORD ST | 0  | 2  | 1  | 0 | 4  | 3  | 0 | 2 | 0 | 2 | 1 | 0 | 1  | 3  | 0  | 0  |
| 44 | OXFORD ST |    | 4  | 4  | 7 | 3  | 2  | 5 | 3 | 0 | 7 | 6 | 6 | 5  | 6  | 9  | 8  |
| 45 | OXFORD ST | 2  | 0  | 0  | 0 | 0  | 0  | 0 | 0 | 2 | 2 | 2 | 0 | 0  | 0  | 0  | 0  |
| 46 | OXFORD ST | 0  | 0  | 0  | 0 | 3  | 1  | 0 | 1 | 0 | 3 | 2 | 4 | 3  | 3  | 3  | 3  |
| 47 | OXFORD ST | 1  | 0  | 1  | 0 | 1  | 0  | 0 | 0 | 0 | 2 | 2 | 1 | 0  | 0  | 1  | 1  |
| 48 | OXFORD ST | 0  | 2  | 2  | 0 | 0  | 0  | 0 | 4 | 1 | 1 | 2 | 2 | 0  | 0  | 0  | 0  |
| 49 | OXFORD ST |    |    |    |   |    |    |   | 3 | 2 |   |   |   |    |    |    |    |
| 50 | OXFORD ST |    |    |    |   |    | 0  | 0 | 2 | 0 | 0 | 0 | 0 | 1  | 0  | 0  |    |
| 51 | OXFORD ST |    |    |    |   |    |    |   | 2 | 1 |   |   |   |    |    |    |    |
| 52 | OXFORD ST | 4  | 3  | 1  | 1 | 0  | 1  | 0 | 1 | 0 | 1 | 0 | 0 | 2  | 1  | 0  | 1  |
| 53 | OXFORD ST | 0  | 1  | 3  | 0 | 0  | 0  | 0 | 2 | 0 | 0 | 0 | 0 | 0  | 0  | 0  | 0  |
| 54 | OXFORD ST | 0  | 2  | 0  | 2 | 0  | 0  | 0 | 1 | 0 | 2 | 2 | 2 | 0  | 0  | 2  | 2  |
| 55 | OXFORD ST | 1  | 2  | 0  | 1 | 0  | 0  | 0 | 1 | 0 | 0 | 0 | 0 | 0  | 0  | 0  | 0  |
| 56 | OXFORD ST | 1  | 2  | 2  | 2 | 0  | 1  | 5 | 8 | 4 | 0 | 0 | 5 | 0  | 4  | 4  | 0  |

|    |           |   |   |   |   |   |   |   |   |   |   |   |   |   |   |   |   |
|----|-----------|---|---|---|---|---|---|---|---|---|---|---|---|---|---|---|---|
| 57 | OXFORD ST | 0 | 0 | 0 | 0 | 1 | 0 | 1 | 1 | 0 | 0 | 0 | 0 | 0 | 0 | 2 | 0 |
| 58 | OXFORD ST | 0 | 0 | 1 | 0 | 1 | 0 | 0 | 1 | 1 | 0 | 0 | 0 | 0 | 0 | 0 | 0 |
| 59 | OXFORD ST |   |   |   |   |   |   |   | 2 | 1 |   |   |   |   |   |   |   |
| 60 | OXFORD ST | 0 | 0 | 0 | 0 | 0 | 0 | 0 | 1 | 1 | 0 | 0 | 0 | 0 | 0 | 0 | 0 |
